# Supplementary material for: Proteomics-based aging clocks in midlife and late-life and risk of dementia
Source: Research Square preprint supplement (doi:10.21203/rs.3.rs-5500348/v1), 2025-01-13
Supplement: Supplementary file 1 [file 9b1b9a5a5a9e20ce8f37e852.xlsx]

## Sheet: Content
Table Appendix 1. Aptamers selected by lasso regression to creat midlife proteomics based clock
Table Appendix 2. Aptamers selected by lasso regression to creat late-life proteomics based clock
Table Appendix 3. Overlapping aptamers between midlife and late-life.

## Sheet: Table 1. midlife
Table Appendix 1.
seqid_in_sample	Protein name	Effect estimate
V2SeqId_10000_28	Beta-crystallin B2	-0.0573361
V2SeqId_10014_31	Zinc finger protein SNAI2	0.0364508
V2SeqId_10023_32	Vitamin D3 receptor	-0.134835
V2SeqId_10043_31	Bromodomain-containing protein 4	-0.11608
V2SeqId_10046_55	Baculoviral IAP repeat-containing protein 2	-0.0219059
V2SeqId_10054_3	Gigaxonin	0.0242756
V2SeqId_10078_5	BAG family molecular chaperone regulator 3	0.0353313
V2SeqId_10085_25	Steroidogenic acute regulatory protein, mitochondrial	-0.00623417
V2SeqId_10366_11	Platelet-derived growth factor receptor alpha	-0.0117416
V2SeqId_10370_21	Signal transducer and activator of transcription 1-alpha/beta	0.0581921
V2SeqId_10390_21	E3 ubiquitin-protein ligase ZNRF3	-0.00354241
V2SeqId_10391_1	Angiopoietin-related protein 3	0.0350823
V2SeqId_10396_6	Induced myeloid leukemia cell differentiation protein Mcl-1	-0.0220213
V2SeqId_10419_1	Scavenger receptor class A member 5	-0.0624391
V2SeqId_10424_31	Neural proliferation differentiation and control protein 1	-0.00669595
V2SeqId_10438_19	Granulocyte-macrophage colony-stimulating factor receptor subunit alpha	-0.0324287
V2SeqId_10442_1	Transmembrane protein 190	0.0689224
V2SeqId_10445_20	Apolipoprotein M	-0.36413
V2SeqId_10447_18	Polyadenylate-binding protein 3	0.0621708
V2SeqId_10453_7	Carcinoembryonic antigen-related cell adhesion molecule 20	-0.0115142
V2SeqId_10506_53	Membrane-associated progesterone receptor component 2	-0.0936074
V2SeqId_10514_5	Prostaglandin-H2 D-isomerase	1.09632
V2SeqId_10521_10	Matrix remodeling-associated protein 8	0.150293
V2SeqId_10530_8	Proteasome subunit beta type-6	-0.0639894
V2SeqId_10546_2	Thrombospondin-type laminin G domain and EAR repeat-containing protein	0.0250501
V2SeqId_10551_7	Linker for activation of T-cells family member 1	-0.00838764
V2SeqId_10552_88	NKG2-F type II integral membrane protein	-0.0414378
V2SeqId_10558_26	Protocadherin-9	0.5725
V2SeqId_10565_19	SLIT and NTRK-like protein 3	0.121667
V2SeqId_10575_31	Poly(U)-binding-splicing factor PUF60	0.483678
V2SeqId_10589_7	UL16-binding protein 6	0.0828229
V2SeqId_10606_34	Torsin-1A-interacting protein 1	0.0427579
V2SeqId_10613_33	Protein CASC4	0.0437958
V2SeqId_10615_18	Myelin protein P0	-0.504533
V2SeqId_10616_67	Podocalyxin-like protein 2	-0.0578311
V2SeqId_10627_87	Amyloid-like protein 2	-0.61152
V2SeqId_10638_1	TERF1-interacting nuclear factor 2	0.0346089
V2SeqId_10643_16	Noelin-3	0.0365158
V2SeqId_10675_223	Thioredoxin-related transmembrane protein 2	0.00773038
V2SeqId_10695_12	Protein WFDC10B	0.0186744
V2SeqId_10702_1	Collagen alpha-1(XXVIII) chain	-0.337523
V2SeqId_10713_151	CMRF35-like molecule 7	0.078249
V2SeqId_10714_7	Angiotensin-converting enzyme	-0.0056085
V2SeqId_10716_35	26S proteasome non-ATPase regulatory subunit 5	-0.154416
V2SeqId_10754_113	Prokineticin-2	-0.124162
V2SeqId_10767_52	Adhesion G-protein coupled receptor G2	0.0625383
V2SeqId_10772_21	Chondroitin sulfate N-acetylgalactosaminyltransferase 2	-0.0434878
V2SeqId_10798_4	CMRF35-like molecule 2	-0.00807118
V2SeqId_10832_24	Beta-1,4-galactosyltransferase 6	0.190934
V2SeqId_10842_7	Beta-1,3-galactosyl-O-glycosyl-glycoprotein beta-1,6-N-acetylglucosaminyltransferase 4	0.114983
V2SeqId_10892_8	Oncostatin-M-specific receptor subunit beta	-0.0278355
V2SeqId_10900_272	Stathmin-2	-0.142324
V2SeqId_10917_40	Guanine nucleotide-binding protein G(I)/G(S)/G(O) subunit gamma-T2	-0.0669841
V2SeqId_10938_13	Lymphocyte function-associated antigen 3	-0.0108449
V2SeqId_10940_25	Sarcalumenin	-0.0979264
V2SeqId_10959_125	BET1-like protein	-0.134179
V2SeqId_10961_15	Retinoic acid receptor responder protein 3	-0.166471
V2SeqId_10977_55	Unique cartilage matrix-associated protein	-0.00985542
V2SeqId_10981_56	Pro-neuregulin-3, membrane-bound isoform	-0.0814993
V2SeqId_11089_7	Immunoglobulin heavy constant alpha 1|Immunoglobulin heavy constant alpha 2	-0.0661102
V2SeqId_11102_22	Regenerating islet-derived protein 4	0.0825361
V2SeqId_11104_13	Chitinase-3-like protein 1	0.0128586
V2SeqId_11109_56	Sushi, von Willebrand factor type A, EGF and pentraxin domain-containing protein 1	0.107915
V2SeqId_11112_18	Protein kish-A	0.00338496
V2SeqId_11120_49	N-acetyltransferase 14	-0.0422838
V2SeqId_11130_158	Voltage-dependent L-type calcium channel subunit beta-4	-0.203768
V2SeqId_11134_30	Peptide chain release factor 1-like, mitochondrial	-0.0554386
V2SeqId_11135_5	39S ribosomal protein L55, mitochondrial	-0.0236016
V2SeqId_11142_11	Angiopoietin-related protein 1	-0.00883709
V2SeqId_11152_46	Kallikrein-13	0.0399067
V2SeqId_11158_40	BICD family-like cargo adapter 1	-0.00145012
V2SeqId_11174_8	Thrombospondin type-1 domain-containing protein 7A	0.0127432
V2SeqId_11175_45	Lysophosphatidylcholine acyltransferase 2	0.135747
V2SeqId_11177_16	Keratin, type II cytoskeletal 5	-0.0275922
V2SeqId_11180_17	SWI/SNF complex subunit SMARCC1	0.112709
V2SeqId_11186_12	Transmembrane protein 52	-0.0906542
V2SeqId_11190_129	ATP-dependent zinc metalloprotease YME1L1	0.0473159
V2SeqId_11192_168	Tubulointerstitial nephritis antigen-like	-0.160474
V2SeqId_11196_31	Collagen alpha-3(VI) chain	-0.742474
V2SeqId_11205_10	Integrin beta-7	-0.00162461
V2SeqId_11208_15	N-acetylglucosamine-1-phosphodiester alpha-N-acetylglucosaminidase	-0.172018
V2SeqId_11214_40	DnaJ homolog subfamily B member 9	-0.717473
V2SeqId_11220_53	Uncharacterized protein C10orf105	-0.224161
V2SeqId_11242_33	Protein-glutamine gamma-glutamyltransferase K	-0.0360403
V2SeqId_11247_20	N-acetylglutamate synthase, mitochondrial	0.0330625
V2SeqId_11252_30	Leucine-rich repeat and calponin homology domain-containing protein 4	0.134977
V2SeqId_11260_47	SUN domain-containing protein 5	0.145707
V2SeqId_11262_39	TraB domain-containing protein	-0.0483273
V2SeqId_11263_57	Calsequestrin-1	0.385093
V2SeqId_11264_33	Xanthine dehydrogenase/oxidase	0.0187094
V2SeqId_11266_8	P-selectin glycoprotein ligand 1	-0.611357
V2SeqId_11273_176	Glutathione S-transferase theta-2B	-0.0220189
V2SeqId_11278_4	Collagen alpha-2(XI) chain	-0.0111915
V2SeqId_11284_24	Leukocyte-associated immunoglobulin-like receptor 1	0.200337
V2SeqId_11292_13	Scavenger receptor class A member 3	-0.0260014
V2SeqId_11297_54	Neurogenic locus notch homolog protein 2	-0.0615128
V2SeqId_11300_32	Sortilin	0.0732562
V2SeqId_11302_237	Tenascin-R	-0.187145
V2SeqId_11342_59	Plexin domain-containing protein 2	-0.0096766
V2SeqId_11371_1	Probable G-protein coupled receptor 101	0.0151004
V2SeqId_11387_3	Cyclic AMP-dependent transcription factor ATF-6 beta	0.510633
V2SeqId_11388_75	WAP four-disulfide core domain protein 2	0.433274
V2SeqId_11424_4	Fumarylacetoacetase	-0.261122
V2SeqId_11429_80	Heterogeneous nuclear ribonucleoproteins C1/C2	-0.0063123
V2SeqId_11431_235	ATP-dependent DNA helicase Q1	0.0338303
V2SeqId_11432_11	Polyglutamine-binding protein 1	-0.054515
V2SeqId_11436_6	Alpha-internexin	-0.105255
V2SeqId_11441_11	Glycogen phosphorylase, liver form	0.0663275
V2SeqId_11468_15	Probable RNA-binding protein 19	-0.0378002
V2SeqId_11510_31	Apolipoprotein L1	-0.339883
V2SeqId_11537_12	Transferrin receptor protein 2	0.050734
V2SeqId_11543_84	LIM domain and actin-binding protein 1	0.16582
V2SeqId_11560_76	Nuclear factor of activated T-cells, cytoplasmic 4	0.0126582
V2SeqId_11563_51	Synaptotagmin-like protein 4	-0.15676
V2SeqId_11566_48	Keratin, type II cytoskeletal 72	-0.0230129
V2SeqId_11570_94	B-cell receptor-associated protein 29	0.117958
V2SeqId_11582_63	DnaJ homolog subfamily A member 2	-0.0772108
V2SeqId_11614_29	Enhancer of rudimentary homolog	-0.0467522
V2SeqId_11638_42	Beta-1,3-galactosyltransferase 2	0.048202
V2SeqId_11646_4	Carbohydrate sulfotransferase 9	0.0886309
V2SeqId_11657_86	Suppressor of cytokine signaling 7	0.00587582
V2SeqId_11661_11	NACHT, LRR and PYD domains-containing protein 1	-0.0249984
V2SeqId_11667_29	Tensin-2	0.0933577
V2SeqId_11671_19	Peregrin	0.14052
V2SeqId_11827_7	Nuclear receptor ROR-gamma	0.0173277
V2SeqId_11934_9	Integrator complex subunit 3	-0.00935446
V2SeqId_11952_1	Immunoglobulin superfamily DCC subclass member 3	-0.0579773
V2SeqId_12008_3	T-cell antigen CD7	-0.175117
V2SeqId_12332_7	Eukaryotic elongation factor 2 kinase	-0.00725945
V2SeqId_12365_108	RuvB-like 1	-0.105094
V2SeqId_12378_71	Tapasin	0.0393164
V2SeqId_12389_4	Origin recognition complex subunit 6	0.136557
V2SeqId_12398_15	Paired box protein Pax-4	0.0885868
V2SeqId_12406_119	GTP-binding protein Di-Ras3	0.0175395
V2SeqId_12417_46	EKC/KEOPS complex subunit TPRKB	0.400859
V2SeqId_12428_2	Lysophospholipase-like protein 1	-0.146565
V2SeqId_12431_13	Protein pelota homolog	-0.000340131
V2SeqId_12437_18	Serine/threonine-protein kinase ULK3	0.0758825
V2SeqId_12439_67	Interferon regulatory factor 9	-0.00164089
V2SeqId_12445_50	Ankyrin repeat domain-containing protein 27	0.00946454
V2SeqId_12450_42	Phosphomevalonate kinase	0.099439
V2SeqId_12453_161	Nuclear RNA export factor 1	-0.0537022
V2SeqId_12458_79	Calcineurin B homologous protein 1	0.014247
V2SeqId_12507_16	Inositol-trisphosphate 3-kinase C	0.00457452
V2SeqId_12509_115	COMM domain-containing protein 1	-0.0127781
V2SeqId_12514_16	tRNA (guanine-N(7)-)-methyltransferase	-0.25898
V2SeqId_12531_5	Endogenous retrovirus group V member 1 Env polyprotein	0.0420494
V2SeqId_12534_10	Calcium-binding and coiled-coil domain-containing protein 2	-0.395615
V2SeqId_12543_76	Zinc finger protein 560	-0.0104309
V2SeqId_12551_3	E3 ubiquitin-protein ligase Itchy homolog	0.00400789
V2SeqId_12576_21	Melanoma-associated antigen 3	-0.0753506
V2SeqId_12580_7	Proteasome subunit beta type-5	-0.0357111
V2SeqId_12585_39	DNA excision repair protein ERCC-1	0.128989
V2SeqId_12587_65	ADP-ribosylation factor-like protein 2	-0.0107964
V2SeqId_12605_1	Exosome complex component RRP40	-0.00397628
V2SeqId_12630_8	Arfaptin-2	0.94086
V2SeqId_12636_113	N-lysine methyltransferase SMYD2	-0.0626337
V2SeqId_12644_63	Adenylosuccinate synthetase isozyme 2	-0.00863633
V2SeqId_12647_52	Histone-lysine N-methyltransferase SETD2	0.160634
V2SeqId_12651_21	[Pyruvate dehydrogenase (acetyl-transferring)] kinase isozyme 2, mitochondrial	0.0185113
V2SeqId_12662_82	Delta(3,5)-Delta(2,4)-dienoyl-CoA isomerase, mitochondrial	-0.0297576
V2SeqId_12665_16	Interleukin enhancer-binding factor 2	0.00760629
V2SeqId_12686_15	3-mercaptopyruvate sulfurtransferase	0.143418
V2SeqId_12687_2	2,4-dienoyl-CoA reductase, mitochondrial	-0.0285746
V2SeqId_12726_3	Regulatory factor X-associated protein	0.0653022
V2SeqId_12734_112	Kinesin-like protein KIF22	-0.111327
V2SeqId_12743_18	BAG family molecular chaperone regulator 5	-0.114127
V2SeqId_12756_3	Transcription regulator protein BACH2	-0.0804588
V2SeqId_12758_47	Glutamate receptor ionotropic, delta-2	0.0573415
V2SeqId_12768_3	Protein phosphatase 1 regulatory subunit 3B	0.0265268
V2SeqId_12772_8	Nuclear pore complex protein Nup98-Nup96	-0.0988144
V2SeqId_12774_12	Potassium/sodium hyperpolarization-activated cyclic nucleotide-gated channel 1	-0.0613361
V2SeqId_12779_30	PR domain zinc finger protein 4	0.0446521
V2SeqId_12785_49	Transcriptional regulator Kaiso	-0.0893196
V2SeqId_12799_65	DnaJ homolog subfamily C member 27	-0.0295798
V2SeqId_12804_5	Glucocorticoid modulatory element-binding protein 2	-0.125485
V2SeqId_12807_89	Rho GTPase-activating protein 30	0.0853731
V2SeqId_12820_1	GRB2-related adapter protein	0.109767
V2SeqId_12825_18	DCC-interacting protein 13-alpha	0.0546016
V2SeqId_12835_101	Pyrin domain-containing protein 1	-0.084556
V2SeqId_12838_28	Dual specificity protein phosphatase 15	0.0822979
V2SeqId_12842_43	Syntaxin-10	-0.00146245
V2SeqId_12871_10	Twinfilin-1	0.0477911
V2SeqId_12873_11	Leukosialin	0.0952033
V2SeqId_12875_28	Ubiquitin domain-containing protein 2	0.160945
V2SeqId_12879_5	Retinoblastoma-like protein 1	-0.0814088
V2SeqId_12923_51	Keratin, type I cytoskeletal 17	0.0206825
V2SeqId_12931_16	Mineralocorticoid receptor	-0.075231
V2SeqId_12934_1	E3 ISG15--protein ligase HERC5	-0.120669
V2SeqId_12940_35	Aldehyde dehydrogenase family 3 member B1	-0.192734
V2SeqId_12975_11	Keratin, type I cytoskeletal 20	0.0665286
V2SeqId_12987_12	Serine/arginine-rich splicing factor 7	-0.211802
V2SeqId_12990_39	Mitogen-activated protein kinase kinase kinase 3	0.0120376
V2SeqId_13032_1	Beclin-1	0.142908
V2SeqId_13043_157	ATPase family AAA domain-containing protein 2	-0.0982596
V2SeqId_13055_53	PH and SEC7 domain-containing protein 1	0.0520684
V2SeqId_13082_9	Protein unc-45 homolog A	0.0342747
V2SeqId_13090_17	Protein S100-A6	-0.111261
V2SeqId_13098_93	Vascular endothelial growth factor D	-0.0726463
V2SeqId_13103_125	Chorionic somatomammotropin hormone 2|Chorionic somatomammotropin hormone 1	0.0359374
V2SeqId_13111_79	B-cell lymphoma 6 protein	-0.0761003
V2SeqId_13112_179	Follistatin-related protein 1	-0.501248
V2SeqId_13113_7	Osteopontin	-0.0383479
V2SeqId_13114_50	Lumican	1.4767
V2SeqId_13130_150	Hexokinase-2	-0.0253371
V2SeqId_13132_14	Semaphorin-5A	-0.0292005
V2SeqId_13268_45	Protein Wnt-5a	0.219454
V2SeqId_13374_4	Beta-defensin 113	-0.0233865
V2SeqId_13375_48	Synaptogyrin-3	0.0666831
V2SeqId_13388_57	Neuroendocrine convertase 1	-0.158194
V2SeqId_13416_8	Transmembrane protein 132D	-0.0480136
V2SeqId_13423_94	Peroxiredoxin-like 2A	-0.00113949
V2SeqId_13434_172	Alpha-parvin	-0.053979
V2SeqId_13438_115	Chordin	0.0186984
V2SeqId_13441_30	Dixin	-0.0249903
V2SeqId_13457_33	ETS-related transcription factor Elf-5	0.0442078
V2SeqId_13464_8	Nutritionally-regulated adipose and cardiac enriched protein homolog	0.0153657
V2SeqId_13470_43	Parathyroid hormone/parathyroid hormone-related peptide receptor	0.0453238
V2SeqId_13474_40	Glutathione S-transferase kappa 1	0.0822922
V2SeqId_13476_16	DNA/RNA-binding protein KIN17	-0.0236031
V2SeqId_13482_14	CCR4-NOT transcription complex subunit 1	-0.00669218
V2SeqId_13495_48	Hydroxycarboxylic acid receptor 2	0.0685892
V2SeqId_13498_1	Inositol oxygenase	-0.0493803
V2SeqId_13502_2	Sodium-independent sulfate anion transporter	-0.0202184
V2SeqId_13509_5	Secretory carrier-associated membrane protein 5	0.00872168
V2SeqId_13516_46	ER membrane protein complex subunit 4	-0.0162612
V2SeqId_13517_3	Patched domain-containing protein 3	-0.018792
V2SeqId_13524_25	Heparan-sulfate 6-O-sulfotransferase 2	-0.165507
V2SeqId_13526_5	Lupus La protein	0.0104171
V2SeqId_13529_39	Nucleosome assembly protein 1-like 2	0.212354
V2SeqId_13565_2	Retinoblastoma-like protein 2	-0.0893366
V2SeqId_13568_30	26S proteasome non-ATPase regulatory subunit 4	-0.167574
V2SeqId_13575_40	Segment polarity protein dishevelled homolog DVL-2	0.253071
V2SeqId_13580_2	UDP-N-acetylhexosamine pyrophosphorylase	-0.054726
V2SeqId_13590_1	Oligoribonuclease, mitochondrial	-0.422641
V2SeqId_13591_31	DNA primase small subunit	0.0480469
V2SeqId_13595_20	Thiamine-triphosphatase	0.0467443
V2SeqId_13602_6	NHP2-like protein 1	-0.18889
V2SeqId_13603_7	Rieske domain-containing protein	0.165003
V2SeqId_13609_11	General transcription factor II-I	-0.0378731
V2SeqId_13610_9	Melanoma-associated antigen 10	0.0805381
V2SeqId_13618_15	Mitotic spindle assembly checkpoint protein MAD1	0.0908204
V2SeqId_13620_10	ATPase ASNA1	0.0388861
V2SeqId_13624_17	NAD kinase	0.105631
V2SeqId_13631_1	Retinoblastoma-binding protein 5	-0.0289416
V2SeqId_13651_54	E3 ubiquitin-protein ligase ZFP91	-0.0437708
V2SeqId_13665_35	Serine/threonine-protein phosphatase 2A regulatory subunit B'' subunit alpha	0.0355382
V2SeqId_13666_222	Carbonic anhydrase-related protein 10	-0.173987
V2SeqId_13680_3	NGFI-A-binding protein 2	0.00892623
V2SeqId_13686_2	Interleukin-5 receptor subunit alpha	0.0907587
V2SeqId_13711_10	Clathrin heavy chain 1	0.0283777
V2SeqId_13713_164	Vesicle-trafficking protein SEC22a	-0.0396925
V2SeqId_13724_27	Fibroblast growth factor 19	0.0485807
V2SeqId_13740_51	Secreted frizzled-related protein 3	0.0804591
V2SeqId_13743_56	Cullin-4B	0.103697
V2SeqId_13745_10	Polycystin-2	-0.0475577
V2SeqId_13939_14	UTP--glucose-1-phosphate uridylyltransferase	0.0830732
V2SeqId_13940_19	Gamma-interferon-inducible protein 16	-0.0657955
V2SeqId_13941_82	Phenylalanine--tRNA ligase, mitochondrial	0.219842
V2SeqId_13978_122	T-box transcription factor TBX3	0.0155896
V2SeqId_13982_33	Regulator of G-protein signaling 18	0.0012241
V2SeqId_13998_26	Adenylosuccinate synthetase isozyme 1	0.0865089
V2SeqId_14006_36	Glycine N-methyltransferase	0.269001
V2SeqId_14011_17	Protein S100-A11	0.0476833
V2SeqId_14012_17	Probable ATP-dependent RNA helicase DHX58	0.109701
V2SeqId_14021_81	Mediator of RNA polymerase II transcription subunit 4	0.0671226
V2SeqId_14025_18	Tumor necrosis factor receptor superfamily member 9	-0.0499063
V2SeqId_14026_24	Interleukin-17F	-0.0313014
V2SeqId_14035_13	T-lymphoma invasion and metastasis-inducing protein 1	0.00423998
V2SeqId_14054_17	Interleukin-15 receptor subunit alpha	0.327865
V2SeqId_14056_4	Glycoprotein hormones alpha chain	-0.0552229
V2SeqId_14063_17	Oncostatin-M	0.0453716
V2SeqId_14088_38	Insulin-like growth factor-binding protein 6	0.821615
V2SeqId_14090_23	Differentially expressed in FDCP 6 homolog	-0.0407423
V2SeqId_14095_1	NKG2-D type II integral membrane protein	0.086267
V2SeqId_14116_129	Protein S100-A4	-0.22002
V2SeqId_14136_234	Complement component C1q receptor	-2.08789
V2SeqId_14143_8	Histone H2B type 2-E	0.20516
V2SeqId_14151_4	Ubiquitin-like protein ISG15	-0.0391447
V2SeqId_14153_8	Ephrin-A3	-0.0115522
V2SeqId_14157_21	14-3-3 protein epsilon	0.109321
V2SeqId_14178_18	Cyclin-dependent kinase inhibitor 3	-0.0318524
V2SeqId_14283_12	Ras-related protein Rab-14	-0.0351545
V2SeqId_14294_61	Methyl-CpG-binding domain protein 1	-0.0637983
V2SeqId_14332_3	Ras-related protein Ral-A	-0.00469459
V2SeqId_14587_16	Growth/differentiation factor 11	-0.0256381
V2SeqId_14628_72	F-box only protein 3	-0.0080715
V2SeqId_14634_13	Lutropin-choriogonadotropic hormone receptor	0.00674491
V2SeqId_14655_1	DnaJ homolog subfamily C member 17	-0.0829727
V2SeqId_14663_44	E3 ubiquitin-protein ligase RNF8	-0.0945372
V2SeqId_14670_1	Ski-like protein	-0.291178
V2SeqId_14689_3	Protein SEC13 homolog	0.4015
V2SeqId_14705_1	Vascular endothelial growth factor D	-0.0300965
V2SeqId_14708_59	Complement component C8 gamma chain	0.0513914
V2SeqId_14711_27	Cystatin-M	-0.346324
V2SeqId_14713_46	Azurocidin	0.212643
V2SeqId_14748_31	Rho GTPase-activating protein 5	0.0492804
V2SeqId_15301_24	Acrosomal protein SP-10	0.1942
V2SeqId_15304_1	Regenerating islet-derived protein 3-alpha	0.167265
V2SeqId_15305_7	Secretagogin	-0.0690831
V2SeqId_15318_75	Protein S100-A10	0.0391361
V2SeqId_15322_35	Death domain-containing protein CRADD	0.590147
V2SeqId_15323_112	Protein argonaute-3	-0.148451
V2SeqId_15324_58	Ferritin light chain	0.0466627
V2SeqId_15326_64	Guanylate-binding protein 1	0.119256
V2SeqId_15336_7	Selenoprotein M	0.0721923
V2SeqId_15343_337	Kininogen-1	-0.00576922
V2SeqId_15347_12	Hemopexin	0.0306719
V2SeqId_15363_32	Apolipoprotein A-V	0.053145
V2SeqId_15370_5	BolA-like protein 1	0.0245932
V2SeqId_15383_200	Endothelin-3	-0.01709
V2SeqId_15385_116	Fatty acid-binding protein, intestinal	0.058284
V2SeqId_15389_1	Frataxin, mitochondrial	0.014195
V2SeqId_15391_114	Growth arrest-specific protein 6	-0.54595
V2SeqId_15412_40	Baculoviral IAP repeat-containing protein 7	0.0049292
V2SeqId_15413_3	Phosphatidylcholine-sterol acyltransferase	-0.00418875
V2SeqId_15416_54	Lysozyme g-like protein 2	0.0463865
V2SeqId_15417_3	Serpin B5	-0.226563
V2SeqId_15426_5	Sialidase-1	-0.216253
V2SeqId_15427_35	Lysyl oxidase homolog 3	0.0114434
V2SeqId_15437_11	Receptor activity-modifying protein 3	0.0186163
V2SeqId_15440_57	Neuroendocrine convertase 2	-0.060528
V2SeqId_15446_25	Pro-neuregulin-1, membrane-bound isoform	-0.036445
V2SeqId_15448_47	Sequestosome-1	-0.022287
V2SeqId_15449_33	T-cell immunoglobulin and mucin domain-containing protein 4	-0.0236679
V2SeqId_15460_9	Dipeptidyl peptidase 4	0.0871076
V2SeqId_15462_28	T-cell surface glycoprotein CD8 alpha chain	-0.178641
V2SeqId_15467_10	Collagen triple helix repeat-containing protein 1	0.134766
V2SeqId_15470_11	Beta-hexosaminidase subunit beta	0.229168
V2SeqId_15472_16	Low-density lipoprotein receptor-related protein 11	0.161106
V2SeqId_15475_4	Phospholipid transfer protein	-0.273776
V2SeqId_15481_45	Cathelicidin antimicrobial peptide	-0.0239517
V2SeqId_15482_12	Alpha-2-macroglobulin-like protein 1	-0.147511
V2SeqId_15483_377	Agrin	0.0794891
V2SeqId_15486_126	Amiloride-sensitive amine oxidase [copper-containing]	0.0159965
V2SeqId_15487_164	Liver carboxylesterase 1	0.000510148
V2SeqId_15491_20	Endosialin	0.57725
V2SeqId_15494_11	Fibroblast growth factor-binding protein 1	-0.106039
V2SeqId_15503_15	Left-right determination factor 2	0.0172248
V2SeqId_15509_2	Alpha-N-acetylglucosaminidase	0.0285837
V2SeqId_15511_37	Neuronal pentraxin receptor	-0.263934
V2SeqId_15513_108	Prostasin	0.322268
V2SeqId_15514_26	Cholinesterase	0.05865
V2SeqId_15522_2	Golgi-associated plant pathogenesis-related protein 1	-0.0931761
V2SeqId_15526_33	Glutathione synthetase	-0.19315
V2SeqId_15527_90	Dihydrolipoyl dehydrogenase, mitochondrial	-0.0757026
V2SeqId_15530_33	Ephrin type-B receptor 4	-0.0853172
V2SeqId_15533_97	Macrophage scavenger receptor types I and II	0.237616
V2SeqId_15540_6	Vimentin	-0.0150472
V2SeqId_15542_19	Creatine kinase U-type, mitochondrial	0.0702845
V2SeqId_15544_25	Kallikrein-14	-0.302139
V2SeqId_15558_63	Glutamyl aminopeptidase	-0.0635373
V2SeqId_15562_24	Beta-glucuronidase	0.0462624
V2SeqId_15565_102	Mucin-16	-0.0801975
V2SeqId_15567_2	T-cell surface glycoprotein CD3 zeta chain	0.0296229
V2SeqId_15570_99	Complement receptor type 2	-0.407421
V2SeqId_15576_158	Eosinophil cationic protein	0.00542023
V2SeqId_15588_17	Alpha-galactosidase A	0.00510373
V2SeqId_15589_1	Vitamin D-binding protein	-0.568391
V2SeqId_15603_20	Integrin alpha-2	-0.0503948
V2SeqId_15613_16	Pancreatic triacylglycerol lipase	0.0749499
V2SeqId_15615_8	Leukocyte immunoglobulin-like receptor subfamily B member 3	-0.0480272
V2SeqId_15626_223	Basement membrane-specific heparan sulfate proteoglycan core protein	-0.0101558
V2SeqId_15631_18	Pregnancy-specific beta-1-glycoprotein 1	-0.0486756
V2SeqId_15635_4	SPARC-related modular calcium-binding protein 2	-0.131564
V2SeqId_15640_54	Transgelin	1.59687
V2SeqId_15653_9	Collagen alpha-1(X) chain	-0.00331491
V2SeqId_15674_3	B-cell antigen receptor complex-associated protein alpha chain	0.0850038
V2SeqId_15678_71	Dickkopf-related protein 2	0.763166
V2SeqId_15686_49	Inhibin beta C chain	0.000236285
V2SeqId_15692_300	Nodal homolog	0.0470093
V2SeqId_15693_9	Progesterone receptor	0.116615
V2SeqId_16043_30	SHC-transforming protein 1	0.0959557
V2SeqId_16057_6	Cation-independent mannose-6-phosphate receptor	0.454147
V2SeqId_16060_99	Nidogen-2	-0.0413452
V2SeqId_16081_38	Aldo-keto reductase family 1 member B10	-0.0563222
V2SeqId_16288_17	Ephrin type-A receptor 4	-0.622303
V2SeqId_16292_288	Gastric inhibitory polypeptide	-0.0495943
V2SeqId_16302_11	BPI fold-containing family A member 2	0.0058959
V2SeqId_16304_6	Leucine-rich repeat-containing G-protein coupled receptor 4	-0.0503344
V2SeqId_16305_10	Cadherin-11	-0.106793
V2SeqId_16309_30	Dickkopf-like protein 1	-0.191679
V2SeqId_16320_139	CD320 antigen	-0.00356467
V2SeqId_16585_16	N-acetyllactosaminide beta-1,3-N-acetylglucosaminyltransferase 4	0.0194197
V2SeqId_16593_3	FAS-associated death domain protein	0.135435
V2SeqId_16599_38	GPN-loop GTPase 1	-0.0585154
V2SeqId_16607_78	Gelsolin	-0.0150678
V2SeqId_16613_3	Cadherin-17	0.0272106
V2SeqId_16614_27	R-spondin-1	0.0531503
V2SeqId_16616_137	Beta-enolase	-0.0855124
V2SeqId_16746_12	Inhibin beta B chain	0.0104291
V2SeqId_16748_1	Bone morphogenetic protein 3	0.0961443
V2SeqId_16749_79	Growth/differentiation factor 10	0.166911
V2SeqId_16751_15	Natriuretic peptides B	-0.0551561
V2SeqId_16781_2	Cytosolic endo-beta-N-acetylglucosaminidase	0.0413158
V2SeqId_16785_45	Defensin-5	-0.259694
V2SeqId_16803_4	Calretinin	-0.076246
V2SeqId_16814_13	Four and a half LIM domains protein 1	0.0712494
V2SeqId_16818_200	CUB domain-containing protein 1	0.746976
V2SeqId_16847_39	Ras-related protein Rab-3B	-0.0500539
V2SeqId_16851_50	Protein SCO2 homolog, mitochondrial	0.0223869
V2SeqId_16858_384	Reticulocalbin-3	-0.0672488
V2SeqId_16865_62	TATA-binding protein-associated factor 2N	-0.642682
V2SeqId_16887_29	Peptidyl-tRNA hydrolase 2, mitochondrial	0.0414072
V2SeqId_16890_37	ADAMTS-like protein 1	2.32583
V2SeqId_16899_59	Oxysterol-binding protein-related protein 9	0.0505481
V2SeqId_16900_29	MAM domain-containing glycosylphosphatidylinositol anchor protein 1	0.0917782
V2SeqId_16902_17	Lysosome-associated membrane glycoprotein 1	0.0267108
V2SeqId_16922_53	Plexin-B3	-0.0477274
V2SeqId_16927_9	Coagulation factor XIII A chain|Coagulation factor XIII B chain	0.053787
V2SeqId_17156_72	Serine/threonine-protein kinase DCLK1	-0.226727
V2SeqId_17158_17	Ubiquitin-conjugating enzyme E2 G1	0.0852105
V2SeqId_17163_117	Annexin A3	0.135169
V2SeqId_17164_15	Annexin A4	-0.00617402
V2SeqId_17170_15	Calcitonin gene-related peptide 2	-0.0692106
V2SeqId_17172_19	Statherin	-0.0014954
V2SeqId_17175_5	Dual specificity mitogen-activated protein kinase kinase 6	0.0123125
V2SeqId_17199_43	Hypoxia-inducible factor 1-alpha inhibitor	0.0666952
V2SeqId_17224_12	Mimecan	0.071625
V2SeqId_17231_1	Plastin-2	-0.340606
V2SeqId_17341_89	Acetyl-CoA acetyltransferase, cytosolic	-0.0690924
V2SeqId_17343_6	Syntaphilin	0.0423508
V2SeqId_17346_61	Follicular dendritic cell secreted peptide	-0.197325
V2SeqId_17408_2	Phosphomannomutase 1	-0.0112808
V2SeqId_17447_52	Secreted frizzled-related protein 4	-0.0814781
V2SeqId_17453_34	Ceruloplasmin	0.0173416
V2SeqId_17460_51	Interferon-induced GTP-binding protein Mx1	-0.0880461
V2SeqId_17474_106	YEATS domain-containing protein 4	-0.0278812
V2SeqId_17495_141	NAD-dependent protein deacetylase sirtuin-3, mitochondrial	0.0182851
V2SeqId_17672_184	Cobalamin binding intrinsic factor	-0.052875
V2SeqId_17677_47	CD160 antigen	-0.0924855
V2SeqId_17685_9	Apolipoprotein A-IV	-0.0182818
V2SeqId_17703_40	Geminin	0.00740945
V2SeqId_17706_4	Protein phosphatase 1 regulatory subunit 1A	-0.140294
V2SeqId_17721_82	Growth arrest-specific protein 7	-0.128497
V2SeqId_17725_37	Harmonin	0.227441
V2SeqId_17736_105	Aprataxin	0.100003
V2SeqId_17739_1	Hydroxyacyl-coenzyme A dehydrogenase, mitochondrial	2.12662e-05
V2SeqId_17751_68	Beta-crystallin B1	-0.0891214
V2SeqId_17761_2	ADP-sugar pyrophosphatase	-0.187427
V2SeqId_17771_35	DNA-directed RNA polymerase III subunit RPC9	0.0661813
V2SeqId_17789_1	Nicotinate-nucleotide pyrophosphorylase [carboxylating]	0.0619256
V2SeqId_17795_176	U6 snRNA-associated Sm-like protein LSm1	0.00265268
V2SeqId_17817_22	DNA damage-inducible transcript 4 protein	-0.0275319
V2SeqId_17820_170	Myeloid leukemia factor 1	-0.159928
V2SeqId_17828_3	Protein S100-A14	0.180544
V2SeqId_17829_2	Three prime repair exonuclease 2	0.103219
V2SeqId_17832_12	Isopentenyl-diphosphate delta-isomerase 2	-0.0692901
V2SeqId_17855_28	Regulator of G-protein signaling 4	0.0727185
V2SeqId_18177_49	NEDD8-activating enzyme E1 regulatory subunit	0.342892
V2SeqId_18180_58	Reticulon-4-interacting protein 1, mitochondrial	0.207554
V2SeqId_18187_16	Aspartoacylase	-0.0464176
V2SeqId_18193_165	Mortality factor 4-like protein 1	-0.016293
V2SeqId_18213_30	NEDD8-conjugating enzyme UBE2F	0.167791
V2SeqId_18216_22	Interleukin-11 receptor subunit alpha	0.158487
V2SeqId_18220_141	Steroid receptor RNA activator 1	0.223201
V2SeqId_18227_3	Cyclin-dependent kinase 2-associated protein 2	-0.0471324
V2SeqId_18240_6	Olfactory marker protein	0.0127771
V2SeqId_18267_74	Caspase recruitment domain-containing protein 17	-0.00722329
V2SeqId_18268_5	G antigen 2A	-0.00890613
V2SeqId_18273_14	G antigen 2D	0.138153
V2SeqId_18275_5	Cysteine-rich protein 1	0.0920581
V2SeqId_18276_34	T-cell leukemia/lymphoma protein 1B	0.178215
V2SeqId_18294_26	Transcription factor SOX-2	0.0810052
V2SeqId_18316_75	Neuronal-specific septin-3	-0.0975592
V2SeqId_18319_7	Pyruvate dehydrogenase protein X component, mitochondrial	-0.151494
V2SeqId_18324_61	Sulfite oxidase, mitochondrial	0.0492731
V2SeqId_18329_4	Ribose-phosphate pyrophosphokinase 2	0.00374546
V2SeqId_18332_17	Complexin-1	0.111447
V2SeqId_18337_4	GDP-mannose 4,6 dehydratase	-0.0556262
V2SeqId_18347_15	Laminin subunit alpha-2|Laminin subunit gamma-1|Laminin subunit beta-1	-0.413746
V2SeqId_18386_36	Glutaredoxin-1	-0.0779321
V2SeqId_18402_1	AMMECR1-like protein	-0.0747259
V2SeqId_18403_25	AMP deaminase 2	-0.0120639
V2SeqId_18409_61	ADP-ribosylation factor 5	-0.00921175
V2SeqId_18414_26	ADP-ribosylation factor-like protein 5A	0.0125284
V2SeqId_18435_40	UBX domain-containing protein 2B	-0.0506724
V2SeqId_18830_1	Intelectin-1	0.547778
V2SeqId_18832_65	Serum amyloid A-2 protein	0.0378396
V2SeqId_18859_7	Eukaryotic translation initiation factor 4E-binding protein 3	0.00611305
V2SeqId_18875_125	Collagen alpha-1(II) chain	0.108502
V2SeqId_18878_15	Gremlin-1	0.0640703
V2SeqId_18880_81	Collagen alpha-1(III) chain	-0.537796
V2SeqId_18881_7	CD97 antigen	0.0407512
V2SeqId_18886_28	Down syndrome cell adhesion molecule-like protein 1	-0.010136
V2SeqId_18892_48	Glypican-4	0.0423313
V2SeqId_18893_26	Adhesion G-protein coupled receptor G1	0.415987
V2SeqId_18894_1	Glutathione peroxidase 2	0.0672798
V2SeqId_18895_54	Glutathione S-transferase Mu 4	-0.000789725
V2SeqId_18898_36	Hepatoma-derived growth factor-like protein 1	0.0505518
V2SeqId_18899_82	Hepatoma-derived growth factor-related protein 3	-0.0142221
V2SeqId_18901_26	Heat shock 70 kDa protein 1B	-0.00196092
V2SeqId_18904_23	Calcium/calmodulin-dependent protein kinase type IV	0.0136159
V2SeqId_18910_45	Protein lin-7 homolog A	-0.072055
V2SeqId_18914_188	Platelet-activating factor acetylhydrolase 2, cytoplasmic	0.00283721
V2SeqId_18921_30	Phosphate-regulating neutral endopeptidase PHEX	0.00158822
V2SeqId_18926_7	Proteasome subunit alpha type-3	0.0992933
V2SeqId_18931_40	Slit homolog 3 protein	-0.0408165
V2SeqId_18932_84	Nicotinamide/nicotinic acid mononucleotide adenylyltransferase 1	-0.0234699
V2SeqId_18933_4	Protein-glutamine gamma-glutamyltransferase 4	0.0187769
V2SeqId_18935_14	Toll-like receptor 5	-0.0471928
V2SeqId_18945_11	Regulator of G-protein signaling 1	-0.189987
V2SeqId_19108_50	Methyl-CpG-binding protein 2	-0.0476142
V2SeqId_19118_47	Osteoclast-stimulating factor 1	0.0563655
V2SeqId_19125_26	cAMP-dependent protein kinase type II-alpha regulatory subunit	-0.18809
V2SeqId_19126_4	Regulation of nuclear pre-mRNA domain-containing protein 1B	0.054283
V2SeqId_19134_66	DNA-directed RNA polymerases I, II, and III subunit RPABC4	0.00442083
V2SeqId_19135_5	7-methylguanosine phosphate-specific 5'-nucleotidase	0.0171604
V2SeqId_19136_22	Methylmalonate-semialdehyde dehydrogenase [acylating], mitochondrial	0.0833409
V2SeqId_19141_22	Death-associated protein 1	-0.00608206
V2SeqId_19143_38	NADH-cytochrome b5 reductase 2	-0.0184102
V2SeqId_19145_4	Melanoregulin	-0.284175
V2SeqId_19154_41	Glia-derived nexin	0.0694404
V2SeqId_19193_18	Prefoldin subunit 3	0.282311
V2SeqId_19200_16	NADH dehydrogenase [ubiquinone] 1 alpha subcomplex subunit 5	0.0640066
V2SeqId_19212_4	Deleted in malignant brain tumors 1 protein	-0.00737245
V2SeqId_19227_18	Basic leucine zipper transcriptional factor ATF-like	-0.0539393
V2SeqId_19231_22	Protein tyrosine phosphatase type IVA 3	0.0433427
V2SeqId_19251_56	Serglycin	-0.0343065
V2SeqId_19279_42	Retinol-binding protein 1	-0.00517785
V2SeqId_19291_2	Calsequestrin-2	0.0660301
V2SeqId_19317_114	Prostatic acid phosphatase	0.124612
V2SeqId_19325_21	Protein ABHD14B	0.0340382
V2SeqId_19329_31	Homeodomain-interacting protein kinase 3	0.0391884
V2SeqId_19331_18	Brain-specific angiogenesis inhibitor 1-associated protein 2	0.0289103
V2SeqId_19357_11	Vesicle-associated membrane protein 7	-0.0178191
V2SeqId_19361_78	Matrilin-3	-0.308956
V2SeqId_19364_163	Proliferating cell nuclear antigen	-0.012468
V2SeqId_19369_17	Histone acetyltransferase KAT2A	0.028242
V2SeqId_19370_30	Heparan sulfate glucosamine 3-O-sulfotransferase 4	0.077675
V2SeqId_19438_68	Pre-mRNA-splicing factor SYF2	0.00576088
V2SeqId_19496_1	N-acetylneuraminate lyase	0.199088
V2SeqId_19511_8	DCN1-like protein 2	-0.00378219
V2SeqId_19516_10	High mobility group protein HMGI-C	0.00824161
V2SeqId_19553_14	Syntaxin-1A	0.122898
V2SeqId_19558_10	Low-density lipoprotein receptor-related protein 4	-0.12251
V2SeqId_19561_216	Plexin-D1	0.323278
V2SeqId_19564_61	Interferon regulatory factor 4	0.133836
V2SeqId_19572_10	CCAAT/enhancer-binding protein gamma	-0.0438953
V2SeqId_19581_15	Insulin-like growth factor-binding protein 5	-0.14225
V2SeqId_19601_15	Ankyrin repeat and SOCS box protein 9	0.0601434
V2SeqId_19602_36	Transcription factor jun-D	-0.0291417
V2SeqId_19616_100	EF-hand domain-containing protein D1	0.21747
V2SeqId_19622_7	Inhibin beta A chain	0.0804693
V2SeqId_19640_2	Parathyroid hormone	-0.0908312
V2SeqId_2212_69	Tissue-type plasminogen activator	0.149531
V2SeqId_2421_7	Brain-derived neurotrophic factor	0.31563
V2SeqId_2436_49	C-X-C motif chemokine 16	-0.251795
V2SeqId_2475_1	Mast/stem cell growth factor receptor Kit	-0.47617
V2SeqId_2516_57	C-C motif chemokine 21	-0.254716
V2SeqId_2585_2	Prolactin	-0.217458
V2SeqId_2590_69	Inactive tyrosine-protein kinase transmembrane receptor ROR1	0.11369
V2SeqId_2614_28	Ephrin-A4	-0.0214915
V2SeqId_2617_56	Receptor tyrosine-protein kinase erbB-3	-0.709736
V2SeqId_2619_72	Tumor-associated calcium signal transducer 2	-0.0989273
V2SeqId_2632_5	Interleukin-12 receptor subunit beta-1	-0.135771
V2SeqId_2633_52	Interleukin-13 receptor subunit alpha-1	0.133719
V2SeqId_2642_4	Platelet-activating factor acetylhydrolase IB subunit beta	-0.0731424
V2SeqId_2654_19	Tumor necrosis factor receptor superfamily member 1A	-0.380394
V2SeqId_2658_27	NT-3 growth factor receptor	0.642063
V2SeqId_2665_26	Tumor necrosis factor receptor superfamily member 17	-0.0514604
V2SeqId_2677_1	Epidermal growth factor receptor	-1.20507
V2SeqId_2704_74	Tumor necrosis factor receptor superfamily member 13B	0.049786
V2SeqId_2732_58	Homeobox protein NANOG	0.0220061
V2SeqId_2753_2	Complement C1q subcomponent subunit A|Complement C1q subcomponent subunit C|Complement C1q subcomponent subunit B	-0.123594
V2SeqId_2773_50	Interleukin-10	-0.0111528
V2SeqId_2806_49	Activin receptor type-1B	0.0356177
V2SeqId_2813_11	Agouti-related protein	-0.858081
V2SeqId_2823_7	COMM domain-containing protein 7	0.0251222
V2SeqId_2834_54	Kallikrein-8	-0.252317
V2SeqId_2837_3	Hepatocyte growth factor receptor	0.0687411
V2SeqId_2839_2	Tumor necrosis factor ligand superfamily member 4	0.079956
V2SeqId_2843_13	Kunitz-type protease inhibitor 2	-0.0599459
V2SeqId_2844_53	Tyrosine-protein kinase receptor Tie-1	0.207896
V2SeqId_2849_49	Allograft inflammatory factor 1	-0.123341
V2SeqId_2864_2	Dual specificity mitogen-activated protein kinase kinase 1	0.123594
V2SeqId_2906_55	Interleukin-4	-0.0172634
V2SeqId_2911_27	Midkine	-0.144447
V2SeqId_2939_10	Artemin	-0.0208802
V2SeqId_2944_66	Neuroblastoma suppressor of tumorigenicity 1	-0.433062
V2SeqId_2949_6	Group 10 secretory phospholipase A2	-0.00792938
V2SeqId_2952_75	Insulin-like growth factor I	-0.209025
V2SeqId_2953_31	Glycoprotein hormones alpha chain|Lutropin subunit beta	-0.223887
V2SeqId_2973_15	Platelet glycoprotein 4	0.0875973
V2SeqId_2974_61	Contactin-1	0.838645
V2SeqId_2975_19	Connective tissue growth factor	-0.0995496
V2SeqId_2979_8	C-X-C motif chemokine 5	0.0188784
V2SeqId_2982_82	Galectin-4	0.271311
V2SeqId_2994_71	Interleukin-1 receptor-like 2	0.17176
V2SeqId_3004_67	Programmed cell death 1 ligand 2	0.127822
V2SeqId_3009_3	Transforming growth factor beta receptor type 3	-0.551042
V2SeqId_3022_4	Cytotoxic T-lymphocyte protein 4	-0.0715407
V2SeqId_3032_11	Follitropin subunit beta|Glycoprotein hormones alpha chain	0.318715
V2SeqId_3035_80	Interleukin-19	-0.248714
V2SeqId_3045_72	Pleiotrophin	1.68129
V2SeqId_3059_50	Tumor necrosis factor ligand superfamily member 13B	0.0326258
V2SeqId_3067_67	Growth/differentiation factor 9	0.146485
V2SeqId_3078_1	Placenta growth factor	-0.00548011
V2SeqId_3079_62	Retinoic acid receptor responder protein 2	0.0218892
V2SeqId_3132_1	Vascular endothelial growth factor C	-0.0480952
V2SeqId_3152_57	Tumor necrosis factor receptor superfamily member 1B	-0.190846
V2SeqId_3168_8	A disintegrin and metalloproteinase with thrombospondin motifs 5	0.942595
V2SeqId_3169_70	Alpha-L-iduronidase	-0.10524
V2SeqId_3172_28	Arylsulfatase B	-0.00595917
V2SeqId_3173_49	N-acylethanolamine-hydrolyzing acid amidase	-0.0412063
V2SeqId_3174_2	A disintegrin and metalloproteinase with thrombospondin motifs 1	-0.192655
V2SeqId_3175_51	A disintegrin and metalloproteinase with thrombospondin motifs 13	-0.175555
V2SeqId_3198_4	Iduronate 2-sulfatase	0.213496
V2SeqId_3209_69	Matrix extracellular phosphoglycoprotein	-0.0491265
V2SeqId_3212_30	Neutral ceramidase	-0.0304387
V2SeqId_3216_2	Polymeric immunoglobulin receptor	-0.226957
V2SeqId_3221_54	Secreted frizzled-related protein 1	-0.0456255
V2SeqId_3222_11	Semaphorin-3A	-0.0149513
V2SeqId_3234_23	Coiled-coil domain-containing protein 80	0.999768
V2SeqId_3280_49	Aggrecan core protein	0.400177
V2SeqId_3284_75	Biglycan	0.154799
V2SeqId_3291_30	Low affinity immunoglobulin epsilon Fc receptor	-0.0231351
V2SeqId_3296_92	Contactin-2	0.262279
V2SeqId_3299_29	Contactin-5	-0.0281715
V2SeqId_3302_58	Cystatin-F	0.0171637
V2SeqId_3320_49	Insulin-like growth factor-binding protein 7	-0.14248
V2SeqId_3325_2	Matrilin-2	-0.302013
V2SeqId_3326_58	Cell adhesion molecule 1	-0.0434163
V2SeqId_3327_27	Netrin-4	-0.526349
V2SeqId_3331_8	RGM domain family member B	-0.459904
V2SeqId_3332_57	Hemojuvelin	-0.102637
V2SeqId_3339_33	Thrombospondin-2	-0.117488
V2SeqId_3344_60	Antithrombin-III	-1.23557
V2SeqId_3352_80	Carbonic anhydrase 6	-0.0098181
V2SeqId_3362_61	Chordin-like protein 1	1.94572
V2SeqId_3364_76	Cathepsin L2	-0.17543
V2SeqId_3365_7	Dickkopf-related protein 4	0.333622
V2SeqId_3366_51	Extracellular matrix protein 1	-0.330888
V2SeqId_3373_5	Granzyme H	-0.218708
V2SeqId_3378_49	Kallikrein-7	-0.160189
V2SeqId_3390_72	Phosphatidylinositol 4,5-bisphosphate 3-kinase catalytic subunit alpha isoform|Phosphatidylinositol 3-kinase regulatory subunit alpha	-0.00531538
V2SeqId_3396_54	Renin	0.155454
V2SeqId_3414_40	Cytoplasmic tyrosine-protein kinase BMX	0.048043
V2SeqId_3415_61	Bone sialoprotein 2	-0.0307275
V2SeqId_3418_12	Calcium/calmodulin-dependent protein kinase type 1D	-0.110103
V2SeqId_3420_21	Carbonic anhydrase 13	0.0658616
V2SeqId_3422_4	Cyclin-dependent kinase 1|G2/mitotic-specific cyclin-B1	0.0531688
V2SeqId_3427_63	Casein kinase II subunit alpha	0.0356109
V2SeqId_3434_34	Fibronectin	0.139416
V2SeqId_3448_13	Insulin receptor	0.22392
V2SeqId_3452_17	Tyrosine-protein kinase Lck	0.0491603
V2SeqId_3470_1	E-selectin	-0.0160451
V2SeqId_3473_78	Thrombopoietin receptor	0.103947
V2SeqId_3480_7	Dual specificity protein phosphatase 3	0.0147048
V2SeqId_3499_77	Interleukin-17B	0.0367688
V2SeqId_3504_58	Hepcidin	0.0139969
V2SeqId_3505_6	Lymphotoxin-alpha|Lymphotoxin-beta	-0.38879
V2SeqId_3508_78	C-C motif chemokine 22	-0.437765
V2SeqId_3535_84	Dickkopf-related protein 1	-0.952351
V2SeqId_3554_24	Adiponectin	-0.0505627
V2SeqId_3581_53	Alpha-2-HS-glycoprotein	-0.290975
V2SeqId_3583_54	Arylsulfatase A	0.0175865
V2SeqId_3585_54	Basigin	-0.334536
V2SeqId_3587_53	Bone morphogenetic protein 10	-0.0369947
V2SeqId_3600_2	Chitotriosidase-1	0.0704793
V2SeqId_3607_71	Dickkopf-related protein 3	0.931529
V2SeqId_3627_71	Membrane metallo-endopeptidase-like 1	-0.0529883
V2SeqId_3630_27	Cell adhesion molecule 3	0.00814594
V2SeqId_3651_50	Vascular endothelial growth factor receptor 2	-0.108027
V2SeqId_3710_49	Plasminogen	-0.367381
V2SeqId_3719_2	Cyclin-dependent kinase inhibitor 1B	-0.00343337
V2SeqId_3727_35	Peptide YY	-0.107978
V2SeqId_3728_52	Secretin	0.161092
V2SeqId_3730_81	Tumor necrosis factor receptor superfamily member 4	0.0835769
V2SeqId_3758_68	Vitamin K-dependent protein C	0.12486
V2SeqId_3795_6	Disintegrin and metalloproteinase domain-containing protein 9	-0.0209434
V2SeqId_3796_79	Angiopoietin-related protein 4	-0.0194678
V2SeqId_3799_11	Carbonic anhydrase 3	0.0243406
V2SeqId_3803_10	Cystatin-D	0.223406
V2SeqId_3807_1	Fibroblast growth factor 23	-0.213237
V2SeqId_3815_14	Interleukin-12 receptor subunit beta-2	-0.138892
V2SeqId_3821_28	MAP kinase-activated protein kinase 5	-0.0849825
V2SeqId_3835_11	Toll-like receptor 2	-0.194427
V2SeqId_3837_6	Tyrosine-protein kinase ZAP-70	-0.00493898
V2SeqId_3845_51	Dynein light chain roadblock-type 1	-0.0285232
V2SeqId_3848_14	Glyceraldehyde-3-phosphate dehydrogenase	0.0793906
V2SeqId_3858_5	Low molecular weight phosphotyrosine protein phosphatase	-0.0709055
V2SeqId_3890_8	L-lactate dehydrogenase B chain	-0.11469
V2SeqId_3891_56	Methyl-CpG-binding domain protein 4	-0.0583219
V2SeqId_3892_21	Mediator of RNA polymerase II transcription subunit 1	-0.0786072
V2SeqId_3893_64	Mesothelin	-0.075529
V2SeqId_3894_15	N-acetyl-D-glucosamine kinase	0.113488
V2SeqId_4122_12	Epithelial discoidin domain-containing receptor 1	-0.136903
V2SeqId_4123_60	Fibroblast growth factor 4	-0.119962
V2SeqId_4125_52	Advanced glycosylation end product-specific receptor	-0.178542
V2SeqId_4136_40	Interleukin-17D	0.0118909
V2SeqId_4138_25	Interleukin-20	-0.15037
V2SeqId_4141_79	C-X-C motif chemokine 10	0.116838
V2SeqId_4144_13	C-C motif chemokine 13	-0.0506802
V2SeqId_4145_58	Neurotrophin-3	-0.347316
V2SeqId_4151_6	Plasminogen	-0.53909
V2SeqId_4155_3	Tenascin	-0.0317553
V2SeqId_4156_74	Transforming growth factor beta-2 proprotein	-0.0435462
V2SeqId_4184_43	Eukaryotic translation initiation factor 4E-binding protein 2	-0.0680279
V2SeqId_4234_8	Interleukin-1 receptor-like 1	-0.0151827
V2SeqId_4237_70	Leucine carboxyl methyltransferase 1	-0.0819259
V2SeqId_4246_40	Neural cell adhesion molecule L1	0.792889
V2SeqId_4261_55	Serum paraoxonase/arylesterase 1	0.0742697
V2SeqId_4297_62	Spondin-1	0.0094836
V2SeqId_4304_18	Ligand-dependent nuclear receptor corepressor-like protein	-0.088754
V2SeqId_4324_33	Cystatin-SA	0.0609156
V2SeqId_4328_2	Brother of CDO	-0.415583
V2SeqId_4374_45	Growth/differentiation factor 15	1.01122
V2SeqId_4394_71	Fibroblast growth factor 8	-0.0280597
V2SeqId_4429_51	Carbohydrate sulfotransferase 6	0.49642
V2SeqId_4455_89	Lactadherin	-0.37533
V2SeqId_4467_49	SPARC-like protein 1	0.212089
V2SeqId_4471_50	Protein-glutamine gamma-glutamyltransferase E	0.0596707
V2SeqId_4487_1	Fibroblast growth factor 7	-0.112274
V2SeqId_4496_60	Macrophage metalloelastase	0.567961
V2SeqId_4534_10	Brain-specific serine protease 4	-0.086193
V2SeqId_4535_50	ADP-ribosyl cyclase/cyclic ADP-ribose hydrolase 2	-0.0270496
V2SeqId_4541_49	Cell adhesion molecule-related/down-regulated by oncogenes	-0.501968
V2SeqId_4549_78	Alpha-(1,3)-fucosyltransferase 5	-0.0929192
V2SeqId_4551_72	Adhesion G-protein coupled receptor G5	-0.134064
V2SeqId_4553_65	Hepatoma-derived growth factor-related protein 2	-0.0948702
V2SeqId_4568_17	SLIT and NTRK-like protein 5	0.100573
V2SeqId_4588_1	Pancreatic prohormone	0.212389
V2SeqId_4673_13	Interleukin-6	-0.0161233
V2SeqId_4703_87	Lymphotoxin-alpha	0.111088
V2SeqId_4708_3	Estradiol 17-beta-dehydrogenase 1	0.0602286
V2SeqId_4718_5	Peptidyl-prolyl cis-trans isomerase B	0.0334877
V2SeqId_4763_31	Afamin	0.00708034
V2SeqId_4801_13	Lactoperoxidase	-0.173777
V2SeqId_4831_4	L-selectin	-0.288428
V2SeqId_4842_62	Glypican-3	-0.115597
V2SeqId_4891_50	Glucagon	-0.0957296
V2SeqId_4904_7	Caspase-2	0.300587
V2SeqId_4908_6	Endoglin	-0.292528
V2SeqId_4910_21	Phospholipase A2	-0.0618845
V2SeqId_4914_10	Glycoprotein hormones alpha chain|Choriogonadotropin subunit beta 3	0.118338
V2SeqId_4915_64	Hemoglobin subunit alpha|Hemoglobin subunit beta	-0.0441343
V2SeqId_4916_2	Immunoglobulin heavy constant delta	-0.0545175
V2SeqId_4917_62	Integrin beta-5|Integrin alpha-V	0.252048
V2SeqId_4923_79	Muellerian-inhibiting factor	0.37736
V2SeqId_4924_32	Interstitial collagenase	-0.0297441
V2SeqId_4930_21	Stanniocalcin-1	0.0998048
V2SeqId_4964_67	Endoplasmic reticulum aminopeptidase 1	0.0171812
V2SeqId_4979_34	Dermatopontin	0.803515
V2SeqId_4982_54	Elafin	0.00964707
V2SeqId_4985_11	Fatty acid-binding protein 5	0.130153
V2SeqId_4986_59	Focal adhesion kinase 1	0.0861323
V2SeqId_4991_12	Glypican-5	-0.0854237
V2SeqId_5004_69	Mitogen-activated protein kinase 11	-0.0382835
V2SeqId_5006_71	Mitogen-activated protein kinase 13	0.0238024
V2SeqId_5011_11	Nicotinamide phosphoribosyltransferase	-0.0576022
V2SeqId_5031_10	Spectrin alpha chain, non-erythrocytic 1	0.0602951
V2SeqId_5032_64	FACT complex subunit SSRP1	-0.0238832
V2SeqId_5036_50	Tumor necrosis factor-inducible gene 6 protein	-0.18437
V2SeqId_5060_62	Programmed cell death 1 ligand 1	-0.0149884
V2SeqId_5061_27	ICOS ligand	0.0376297
V2SeqId_5063_12	Natural killer cell receptor 2B4	-0.0552412
V2SeqId_5065_8	CD83 antigen	-0.0104827
V2SeqId_5066_134	CMRF35-like molecule 6	-0.0844605
V2SeqId_5078_82	Ephrin type-B receptor 6	-0.0866716
V2SeqId_5087_5	Interleukin-22 receptor subunit alpha-2	-0.194433
V2SeqId_5090_49	Leukocyte immunoglobulin-like receptor subfamily B member 1	-0.0149332
V2SeqId_5095_21	Killer cell immunoglobulin-like receptor 2DL4	0.0642435
V2SeqId_5102_55	MHC class I polypeptide-related sequence B	0.106454
V2SeqId_5103_30	Cell surface glycoprotein CD200 receptor 1	-0.189919
V2SeqId_5106_52	Neurogenic locus notch homolog protein 2	0.081377
V2SeqId_5108_72	Neurogenic locus notch homolog protein 3	0.927087
V2SeqId_5116_62	Roundabout homolog 2	-0.231343
V2SeqId_5121_3	Semaphorin-6B	0.161065
V2SeqId_5138_50	Tumor necrosis factor receptor superfamily member 12A	0.00777405
V2SeqId_5178_5	High affinity cAMP-specific 3',5'-cyclic phosphodiesterase 7A	0.0684645
V2SeqId_5196_7	Glycylpeptide N-tetradecanoyltransferase 1	-0.0717052
V2SeqId_5223_59	Glucokinase regulatory protein	0.0646316
V2SeqId_5226_36	Casein kinase II subunit alpha'|Casein kinase II subunit beta	-0.0114716
V2SeqId_5229_90	Inosine-5'-monophosphate dehydrogenase 1	0.0524618
V2SeqId_5230_99	3-hydroxy-3-methylglutaryl-coenzyme A reductase	-0.0149205
V2SeqId_5238_26	Peptidyl-prolyl cis-trans isomerase E	0.00199789
V2SeqId_5307_12	Coagulation factor IX	0.0374931
V2SeqId_5340_24	Caspase-10	-0.125088
V2SeqId_5345_51	Cytoskeleton-associated protein 2	0.0648081
V2SeqId_5350_14	Glypican-6	0.230349
V2SeqId_5352_11	Tumor necrosis factor receptor superfamily member 14	0.252389
V2SeqId_5363_51	Semaphorin-3E	0.416049
V2SeqId_5364_7	Protein SET	-0.371881
V2SeqId_5400_52	Leptin receptor	0.00224689
V2SeqId_5430_66	Tyrosine-protein phosphatase non-receptor type substrate 1	0.000290983
V2SeqId_5437_63	Fatty acid-binding protein, heart	-0.144672
V2SeqId_5451_1	CD166 antigen	0.326332
V2SeqId_5452_71	Asialoglycoprotein receptor 1	-0.0469344
V2SeqId_5459_33	Cystatin-SN	0.0177326
V2SeqId_5463_22	Growth arrest-specific protein 1	-0.490273
V2SeqId_5481_16	Ras GTPase-activating protein 1	0.00274805
V2SeqId_5486_73	Intercellular adhesion molecule 2	0.106351
V2SeqId_5509_7	Pro-epidermal growth factor	-0.0446874
V2SeqId_5534_49	Tumor necrosis factor receptor superfamily member 10B	0.0587273
V2SeqId_5542_22	Neuropilin-1	-0.130702
V2SeqId_5584_21	Transcobalamin-2	-0.0166106
V2SeqId_5620_13	Peptidyl-glycine alpha-amidating monooxygenase	-0.00928907
V2SeqId_5626_20	Chymotrypsin-C	0.00979043
V2SeqId_5629_58	NKG2-A/NKG2-B type II integral membrane protein	-0.0422476
V2SeqId_5631_83	Promotilin	0.445469
V2SeqId_5632_6	Cartilage acidic protein 1	0.968159
V2SeqId_5636_10	Microfibril-associated glycoprotein 4	-0.123112
V2SeqId_5639_49	Neuropilin and tolloid-like protein 1	-0.0762929
V2SeqId_5648_28	Chymotrypsinogen B2	0.0407807
V2SeqId_5677_15	Uncharacterized protein C2orf66	-0.0172348
V2SeqId_5680_54	Odorant-binding protein 2b	-0.0235678
V2SeqId_5682_13	Vasorin	-0.25343
V2SeqId_5690_49	Tuftelin	0.169261
V2SeqId_5691_2	Cysteine-rich secretory protein LCCL domain-containing 2	-0.00719323
V2SeqId_5698_60	Tenascin-X	-0.449237
V2SeqId_5701_81	Tetranectin	-0.174259
V2SeqId_5722_78	Lysosomal Pro-X carboxypeptidase	0.093503
V2SeqId_5723_4	Insulin-like 3	-0.106046
V2SeqId_5726_49	Sperm-associated antigen 11A	0.13823
V2SeqId_5740_17	Roundabout homolog 1	-0.274159
V2SeqId_5743_82	Cocaine- and amphetamine-regulated transcript protein	-0.164348
V2SeqId_5749_53	Colipase	-0.0244593
V2SeqId_5762_35	Sperm-associated antigen 11B	0.0712632
V2SeqId_5801_72	Beta-nerve growth factor	-0.00690052
V2SeqId_5852_6	Protein S100-A12	-0.107557
V2SeqId_5882_34	Elongation factor 1-beta	0.086528
V2SeqId_5909_51	Nucleoside diphosphate kinase A	-0.0129693
V2SeqId_5918_5	Proteasome activator complex subunit 1	-0.0398119
V2SeqId_5934_1	Ferritin heavy chain|Ferritin light chain	0.0461521
V2SeqId_5954_62	Parathyroid hormone	0.0601735
V2SeqId_5980_55	BolA-like protein 3	-0.0497996
V2SeqId_6027_31	Relaxin-3	-0.167547
V2SeqId_6060_2	Prolactin-inducible protein	-0.0303571
V2SeqId_6081_52	Procollagen C-endopeptidase enhancer 2	-0.311186
V2SeqId_6086_15	Chordin-like protein 2	-0.318519
V2SeqId_6117_4	Neuroendocrine convertase 2	0.142149
V2SeqId_6123_69	Cellular tumor antigen p53	0.00499003
V2SeqId_6168_11	Cellular tumor antigen p53	-0.0338065
V2SeqId_6210_100	Interferon alpha-5	0.0801738
V2SeqId_6214_84	Interferon alpha-8	0.0425455
V2SeqId_6219_14	PDZ domain-containing protein 11	0.0419622
V2SeqId_6227_1	Kallikrein-10	-0.318616
V2SeqId_6228_58	Sperm acrosome membrane-associated protein 1	0.0814866
V2SeqId_6245_4	Nectin-2	-0.255481
V2SeqId_6247_9	Signal-regulatory protein beta-1	-0.0160114
V2SeqId_6255_74	Probable carboxypeptidase X1	-0.0763694
V2SeqId_6257_56	Cell growth regulator with EF hand domain protein 1	-0.336542
V2SeqId_6281_51	CMP-N-acetylneuraminate-beta-galactosamide-alpha-2,3-sialyltransferase 2	-0.0129588
V2SeqId_6290_3	Urotensin-2B	-0.00381829
V2SeqId_6304_8	Complement C1q tumor necrosis factor-related protein 1	-0.105263
V2SeqId_6342_10	Nephronectin	0.0746214
V2SeqId_6350_43	Apolipoprotein C-II	-0.105966
V2SeqId_6357_83	Chymotrypsin-like elastase family member 3B	0.0131106
V2SeqId_6360_7	Beta-defensin 128	-0.146747
V2SeqId_6364_7	Tapasin-related protein	0.00264963
V2SeqId_6367_66	Fibromodulin	-0.89561
V2SeqId_6371_50	Angiopoietin-related protein 7	-0.016612
V2SeqId_6373_54		0.487454
V2SeqId_6375_75	Xyloside xylosyltransferase 1	-0.195821
V2SeqId_6379_62	ADAMTS-like protein 2	-0.330714
V2SeqId_6382_17	Beta-mannosidase	-0.12997
V2SeqId_6385_63	von Willebrand factor A domain-containing protein 1	-0.261652
V2SeqId_6388_21	Coiled-coil domain-containing protein 126	-0.195402
V2SeqId_6392_7	WNT1-inducible-signaling pathway protein 2	1.58161
V2SeqId_6393_63	Endoplasmin	0.0294699
V2SeqId_6402_8	Paired immunoglobulin-like type 2 receptor alpha	-0.0194435
V2SeqId_6408_2	Inhibin beta C chain	0.0916669
V2SeqId_6411_58	Beta-defensin 135	0.0681967
V2SeqId_6414_8	Out at first protein homolog	0.0839258
V2SeqId_6415_90	Carboxypeptidase N subunit 2	0.599838
V2SeqId_6425_87	Matrix metalloproteinase-19	0.158602
V2SeqId_6434_18	Retina-specific copper amine oxidase	0.0779509
V2SeqId_6450_8	Gastrotropin	-0.00706023
V2SeqId_6453_70	Leukocyte immunoglobulin-like receptor subfamily B member 4	-0.197937
V2SeqId_6457_50	Protocadherin gamma-A1	0.0228004
V2SeqId_6471_53	Complement factor H-related protein 4	-0.00882409
V2SeqId_6472_40	Melanocyte protein PMEL	-0.434681
V2SeqId_6478_2	IgLON family member 5	0.349413
V2SeqId_6485_59	Immunoglobulin lambda-like polypeptide 1	-0.149272
V2SeqId_6491_59	Kallikrein-15	-0.00278501
V2SeqId_6496_60	Protein delta homolog 1	0.00641327
V2SeqId_6504_65	Lysyl oxidase homolog 2	-0.0989123
V2SeqId_6507_16	Neural cell adhesion molecule 2	-0.187568
V2SeqId_6510_56	E3 ubiquitin-protein ligase RNF128	-0.0954107
V2SeqId_6517_14	Growth/differentiation factor 10	0.111836
V2SeqId_6520_87	Matrix Gla protein	-0.664519
V2SeqId_6525_17	Dual specificity protein phosphatase 13 isoform A	-0.0649084
V2SeqId_6527_1	TLR4 interactor with leucine rich repeats	-0.149256
V2SeqId_6531_29	Protein FAM162A	0.0792366
V2SeqId_6545_58	Major prion protein	0.0752892
V2SeqId_6550_4	Intercellular adhesion molecule 4	0.115398
V2SeqId_6555_58	Stomatin-like protein 2, mitochondrial	-0.0815211
V2SeqId_6556_5	Ectonucleotide pyrophosphatase/phosphodiesterase family member 5	-0.330924
V2SeqId_6557_50	Leucine-rich repeat-containing protein 15	0.392234
V2SeqId_6561_77		0.153034
V2SeqId_6571_75	Uncharacterized protein C17orf78	0.18329
V2SeqId_6578_29	Tenomodulin	0.195835
V2SeqId_6586_19	Disintegrin and metalloproteinase domain-containing protein 11	0.0367382
V2SeqId_6593_5	Polypeptide N-acetylgalactosaminyltransferase 3	-0.222852
V2SeqId_6600_70	RELT-like protein 2	-0.0185005
V2SeqId_6606_61	Metastasis-suppressor KiSS-1	0.000893793
V2SeqId_6624_94	Protein Wnt-11	-0.129662
V2SeqId_6626_81	Carbohydrate sulfotransferase 12	0.108737
V2SeqId_6647_55	Polyubiquitin-C	-0.0524861
V2SeqId_6649_51	Netrin-1	0.0928403
V2SeqId_6653_58	Leukocyte surface antigen CD47	0.0984627
V2SeqId_6715_63	Alkaline phosphatase, germ cell type	-0.0427634
V2SeqId_6900_30	Ubiquitin-conjugating enzyme E2 J1	0.0295642
V2SeqId_6904_14	Leucine-rich repeat transmembrane neuronal protein 2	-0.101166
V2SeqId_6917_49	Leucine-rich repeat-containing protein 3	-0.093111
V2SeqId_6918_183	Cholecystokinin	0.042379
V2SeqId_6920_1	GDNF family receptor alpha-like	0.0908991
V2SeqId_6921_24	Beta-1,4-galactosyltransferase 3	0.300299
V2SeqId_6933_20	39S ribosomal protein L34, mitochondrial	0.0025242
V2SeqId_6938_21	Protocadherin gamma-A12	-0.27667
V2SeqId_6947_4	Type 2 lactosamine alpha-2,3-sialyltransferase	-0.0540434
V2SeqId_6948_82	Polyphosphoinositide phosphatase	-0.00913034
V2SeqId_6962_5	HLA class II histocompatibility antigen, DR beta 3 chain	0.00115437
V2SeqId_6965_19	Contactin-associated protein-like 2	-0.356329
V2SeqId_6969_14	WAP four-disulfide core domain protein 5	-0.140549
V2SeqId_6998_106	Aspartyl/asparaginyl beta-hydroxylase	0.118274
V2SeqId_7016_12	Beta-1,3-galactosyl-O-glycosyl-glycoprotein beta-1,6-N-acetylglucosaminyltransferase	0.106296
V2SeqId_7018_10	Ribosome biogenesis protein TSR3 homolog	-0.0104941
V2SeqId_7019_13	Semaphorin-7A	0.304058
V2SeqId_7045_4	BCL2/adenovirus E1B 19 kDa protein-interacting protein 3	0.15753
V2SeqId_7048_4	Carcinoembryonic antigen-related cell adhesion molecule 19	-0.0452205
V2SeqId_7049_2	Disintegrin and metalloproteinase domain-containing protein 23	0.0248449
V2SeqId_7054_87	C-type lectin domain family 2 member D	0.0301517
V2SeqId_7069_9	t-SNARE domain-containing protein 1	0.0815573
V2SeqId_7070_25	Kell blood group glycoprotein	-0.0540382
V2SeqId_7076_17	Endothelin-converting enzyme-like 1	0.0464943
V2SeqId_7085_81	Corneodesmosin	0.136468
V2SeqId_7092_7	Protein disulfide-isomerase-like protein of the testis	-0.0495948
V2SeqId_7105_7	CDK5 and ABL1 enzyme substrate 2	0.0303134
V2SeqId_7110_2	DnaJ homolog subfamily B member 11	-0.0766555
V2SeqId_7116_31	Osteoclast-associated immunoglobulin-like receptor	-0.038867
V2SeqId_7121_2	Synaptotagmin-7	0.0677157
V2SeqId_7128_9	von Willebrand factor A domain-containing protein 2	-0.0251128
V2SeqId_7137_8	Mitochondrial peptide methionine sulfoxide reductase	0.0527412
V2SeqId_7139_14	SLIT and NTRK-like protein 4	-0.48445
V2SeqId_7141_21	Alpha-1,3-mannosyl-glycoprotein 4-beta-N-acetylglucosaminyltransferase B	-0.0997651
V2SeqId_7145_1	Inter-alpha-trypsin inhibitor heavy chain H3	-0.0493468
V2SeqId_7147_35	WAP four-disulfide core domain protein 8	0.193395
V2SeqId_7153_66	Neugrin	-0.0312078
V2SeqId_7154_92	Protein LEG1 homolog	-0.209205
V2SeqId_7156_2	Alpha-(1,3)-fucosyltransferase 10	0.0688631
V2SeqId_7163_26	Extracellular glycoprotein lacritin	-0.0368002
V2SeqId_7179_69	Neurofascin	0.410909
V2SeqId_7185_29	Platelet glycoprotein V	0.0168715
V2SeqId_7194_36	Neuroplastin	-0.148506
V2SeqId_7200_4	Leucine-rich repeat and fibronectin type-III domain-containing protein 2	-0.0766278
V2SeqId_7202_107	Semaphorin-6C	-0.156611
V2SeqId_7218_87	Sodium/potassium-transporting ATPase subunit beta-2	-0.469641
V2SeqId_7227_75	Cochlin	0.00681853
V2SeqId_7228_2	Alpha-N-acetylgalactosaminide alpha-2,6-sialyltransferase 6	-0.026178
V2SeqId_7246_4	FRAS1-related extracellular matrix protein 2	0.156049
V2SeqId_7251_64	Complement C1q tumor necrosis factor-related protein 3	0.511646
V2SeqId_7257_18	Tuberoinfundibular peptide of 39 residues	0.0336688
V2SeqId_7266_4	Serpin A9	0.0294694
V2SeqId_7267_2	Serine palmitoyltransferase 2	0.206239
V2SeqId_7551_33	Transforming growth factor beta activator LRRC32	0.677397
V2SeqId_7628_40	Cysteine-rich with EGF-like domain protein 1	0.0311553
V2SeqId_7655_11	Natriuretic peptides B	0.119665
V2SeqId_7717_95	Cystic fibrosis transmembrane conductance regulator	-0.0408841
V2SeqId_7732_45	Vesicle-associated membrane protein 4	-0.0710618
V2SeqId_7738_299	Syntaxin-2	-0.215615
V2SeqId_7745_3	CDGSH iron-sulfur domain-containing protein 1	-0.020419
V2SeqId_7748_11	NADH dehydrogenase [ubiquinone] flavoprotein 2, mitochondrial	-0.0652963
V2SeqId_7754_11	Protein jagged-1	0.0757843
V2SeqId_7778_104	Caspase recruitment domain-containing protein 19	-0.0697162
V2SeqId_7782_34	Epididymal secretory protein E3-beta	0.0305566
V2SeqId_7810_20	Complement C1q tumor necrosis factor-related protein 5	-0.158729
V2SeqId_7827_20	Disintegrin and metalloproteinase domain-containing protein 32	0.0401202
V2SeqId_7835_2	BCL2/adenovirus E1B 19 kDa protein-interacting protein 3-like	0.0141643
V2SeqId_7849_3	Glutaminyl-peptide cyclotransferase	-0.105722
V2SeqId_7856_51	Protein FAM151A	-0.0943021
V2SeqId_7857_22	Neurotensin/neuromedin N	-0.0694646
V2SeqId_7861_9	Tyrosine-protein kinase transmembrane receptor ROR2	-0.503365
V2SeqId_7864_3	Sialic acid-binding Ig-like lectin 8	-0.00128529
V2SeqId_7867_154	Alpha-N-acetylgalactosaminide alpha-2,6-sialyltransferase 1	0.126679
V2SeqId_7880_9	Proteasome subunit alpha type-1	-0.0262225
V2SeqId_7887_57	Cytochrome c oxidase subunit 5B, mitochondrial	0.0183952
V2SeqId_7892_132	Protein FAM234B	-0.00497921
V2SeqId_7918_114	Alpha-amylase 1	0.0405779
V2SeqId_7923_41	Semaphorin-4C	-0.114354
V2SeqId_7924_7	T-cell surface glycoprotein CD3 gamma chain	0.01236
V2SeqId_7930_3	Exosome complex component CSL4	-0.102372
V2SeqId_7944_1	Killer cell immunoglobulin-like receptor 3DL3	-0.102882
V2SeqId_7945_10	Semaphorin-6A	0.0122431
V2SeqId_7948_129	Glycolipid transfer protein domain-containing protein 2	0.113184
V2SeqId_7956_11	MICOS complex subunit MIC10	0.0121499
V2SeqId_7957_2	Secretogranin-3	-0.4557
V2SeqId_7960_53	POTE ankyrin domain family member G	-0.00584691
V2SeqId_7969_163	Protein WFDC11	-0.0057622
V2SeqId_7970_315	Ecto-ADP-ribosyltransferase 3	-0.348563
V2SeqId_7976_19	DOMON domain-containing protein FRRS1L	-0.117605
V2SeqId_7980_72	N-acetyllactosaminide beta-1,3-N-acetylglucosaminyltransferase 2	0.0308334
V2SeqId_7983_1	Protocadherin gamma-C5	0.0261689
V2SeqId_7991_54	IQ domain-containing protein F1	0.0256717
V2SeqId_8003_57	Leucine-rich repeat LGI family member 3	-0.0704453
V2SeqId_8013_9	VIP36-like protein	-0.0256762
V2SeqId_8018_43	V-set and immunoglobulin domain-containing protein 2	0.0138729
V2SeqId_8028_22	Serine protease inhibitor Kazal-type 5	-0.11013
V2SeqId_8036_75	Follitropin subunit beta	0.0223875
V2SeqId_8038_41	Sterol-4-alpha-carboxylate 3-dehydrogenase, decarboxylating	-0.0111255
V2SeqId_8044_90	Glycoprotein Xg	0.0432304
V2SeqId_8053_16	DnaJ homolog subfamily B member 14	-0.00815028
V2SeqId_8055_33	Integral membrane protein DGCR2/IDD	0.0340049
V2SeqId_8064_125	Poliovirus receptor	-0.0587594
V2SeqId_8065_245	Prostate and testis expressed protein 4	-0.134055
V2SeqId_8074_32	Transmembrane protein 70, mitochondrial	-0.0161643
V2SeqId_8080_24	Prostate-associated microseminoprotein	-0.581892
V2SeqId_8086_49	Integral membrane protein 2B	0.00748816
V2SeqId_8089_173	Nuclear receptor subfamily 4 group A member 1	0.152827
V2SeqId_8093_13	Myogenesis-regulating glycosidase	0.0140505
V2SeqId_8099_42	Spondin-2	-0.0196492
V2SeqId_8100_15	Protein ADM2	-0.07004
V2SeqId_8106_15	Translocon-associated protein subunit alpha	0.0641322
V2SeqId_8233_2	Inter-alpha-trypsin inhibitor heavy chain H5	0.0459737
V2SeqId_8235_48	Secretogranin-1	0.24316
V2SeqId_8250_2	Receptor-type tyrosine-protein phosphatase eta	-0.0327771
V2SeqId_8253_2	Protein O-linked-mannose beta-1,2-N-acetylglucosaminyltransferase 1	-0.0486984
V2SeqId_8258_22	UDP-glucuronic acid decarboxylase 1	-0.63292
V2SeqId_8263_64	TYMS opposite strand protein	-0.270939
V2SeqId_8272_22	3-keto-steroid reductase	0.0463099
V2SeqId_8273_84	Interleukin-31 receptor subunit alpha	0.000733262
V2SeqId_8274_64	Syntaxin-7	-0.0264832
V2SeqId_8304_50	Tumor necrosis factor receptor superfamily member 11B	0.125798
V2SeqId_8318_13	Sprouty-related, EVH1 domain-containing protein 1	0.0489033
V2SeqId_8320_5	SAFB-like transcription modulator	0.00740288
V2SeqId_8328_9	Ethanolamine kinase 1	0.0089786
V2SeqId_8337_65	Receptor-type tyrosine-protein phosphatase U	0.260628
V2SeqId_8346_9	Dipeptidyl peptidase 2	0.188714
V2SeqId_8347_222	Beta-defensin 129	-0.230135
V2SeqId_8352_26	Sialic acid-binding Ig-like lectin 12	-0.0527193
V2SeqId_8355_80	Isthmin-1	-0.0118422
V2SeqId_8360_169	Natural cytotoxicity triggering receptor 1	0.0121502
V2SeqId_8366_19	Uncharacterized protein C1orf115	-0.174724
V2SeqId_8367_142	V-set and immunoglobulin domain-containing protein 1	-0.105262
V2SeqId_8376_25	Lutropin subunit beta	0.220795
V2SeqId_8380_244	Protein delta homolog 1	-0.2776
V2SeqId_8383_20	Uncharacterized protein C11orf94	-0.155252
V2SeqId_8394_56	Non-secretory ribonuclease	-0.0577388
V2SeqId_8396_42	Fatty-acid amide hydrolase 2	-0.000351226
V2SeqId_8402_22	Cytokine-like protein 1	-0.159209
V2SeqId_8404_102	BolA-like protein 2	0.0393214
V2SeqId_8406_17	Insulin-like growth factor I	0.0141574
V2SeqId_8447_11	Appetite-regulating hormone	-0.104599
V2SeqId_8464_31	R-spondin-4	0.592974
V2SeqId_8465_52	Pro-cathepsin H	-0.0883816
V2SeqId_8468_19	Prostate-specific antigen	0.400163
V2SeqId_8470_213	Ribonuclease H1	-0.0233077
V2SeqId_8479_4	Stromelysin-2	-0.0726048
V2SeqId_8480_29	EGF-containing fibulin-like extracellular matrix protein 1	0.509374
V2SeqId_8520_8	Disintegrin and metalloproteinase domain-containing protein 30	-0.00188447
V2SeqId_8601_167	Prolow-density lipoprotein receptor-related protein 1	0.018802
V2SeqId_8633_18	E3 ubiquitin-protein ligase RNF128	0.0231032
V2SeqId_8660_5	Olfactomedin-like protein 3	-0.062557
V2SeqId_8756_41	Potassium voltage-gated channel subfamily E regulatory beta subunit 5	-0.0427693
V2SeqId_8766_29	Leukocyte immunoglobulin-like receptor subfamily A member 5	-0.0126291
V2SeqId_8768_4	B-cell lymphoma/leukemia 10	0.201718
V2SeqId_8772_5	Ephrin-B2	0.0477539
V2SeqId_8778_3	Noggin	-0.212223
V2SeqId_8780_2	Protocadherin-10	-0.0150774
V2SeqId_8784_7	BRCA1-A complex subunit Abraxas 1	-0.0198212
V2SeqId_8803_61	Nectin-1	-0.189484
V2SeqId_8804_39	Collagen alpha-1(XX) chain	0.0698831
V2SeqId_8811_24	BMP and activin membrane-bound inhibitor homolog	-0.0111311
V2SeqId_8832_55	Bone marrow stromal antigen 2	0.0297648
V2SeqId_8841_65	Cartilage intermediate layer protein 2	-0.449807
V2SeqId_8859_51	Carbonic anhydrase-related protein 11	-0.10404
V2SeqId_8864_59	Centromere protein W	0.0626313
V2SeqId_8870_38	Nucleophosmin	0.0240288
V2SeqId_8878_48	YTH domain-containing protein 1	0.24226
V2SeqId_8888_33	Small integral membrane protein 9	-0.0291386
V2SeqId_8890_9	Transmembrane protein 132B	-1.49304
V2SeqId_8906_60	Leucine-rich repeat and transmembrane domain-containing protein 2	0.0141128
V2SeqId_8909_77	Glucosamine-6-phosphate isomerase 1	-0.0826863
V2SeqId_8925_25	Ribonucleoside-diphosphate reductase subunit M2 B	-0.0125556
V2SeqId_8933_84	Myocyte-specific enhancer factor 2C	0.00222091
V2SeqId_8948_13	Disintegrin and metalloproteinase domain-containing protein 19	-0.0346679
V2SeqId_8956_96	Scavenger receptor class F member 2	2.3658
V2SeqId_8974_172	Collagen alpha-1(XV) chain	-0.794791
V2SeqId_8976_13	Beta-1,4 N-acetylgalactosaminyltransferase 1	-0.0149366
V2SeqId_8982_65	Thrombospondin-3	-0.14683
V2SeqId_9002_36	Serpin A11	0.0627079
V2SeqId_9004_24	Low-density lipoprotein receptor class A domain-containing protein 4	0.0199649
V2SeqId_9015_1	Proteoglycan 3	0.124734
V2SeqId_9017_58	Lactase-phlorizin hydrolase	-0.0353528
V2SeqId_9018_38	Protocadherin-10	0.642556
V2SeqId_9035_2	Max-interacting protein 1	0.00806134
V2SeqId_9038_12	Protein JTB	-0.110741
V2SeqId_9044_1	Contactin-associated protein-like 5	-0.0727412
V2SeqId_9055_81	Myocardial zonula adherens protein	-0.138798
V2SeqId_9059_14	Rap guanine nucleotide exchange factor 5	0.230235
V2SeqId_9060_27	Protein turtle homolog B	0.303231
V2SeqId_9064_12	RING finger protein 215	-0.0117804
V2SeqId_9075_121	Major intrinsically disordered Notch2-binding receptor 1	-0.0965487
V2SeqId_9076_25	Proenkephalin-A	0.0858161
V2SeqId_9094_5	C-type lectin domain family 4 member C	-0.0370553
V2SeqId_9110_2	Synaptotagmin-17	0.000720951
V2SeqId_9118_7	PH and SEC7 domain-containing protein 2	-0.142147
V2SeqId_9121_28	Galactoside 2-alpha-L-fucosyltransferase 2	0.176056
V2SeqId_9123_18	Voltage-dependent calcium channel beta subunit-associated regulatory protein	-0.121424
V2SeqId_9127_4	Prestin	-0.0303747
V2SeqId_9172_69	Neutrophil collagenase	-0.235406
V2SeqId_9178_30	Pro-neuregulin-1, membrane-bound isoform	0.0905089
V2SeqId_9185_15	Trefoil factor 1	0.250293
V2SeqId_9190_7	CD63 antigen	0.111011
V2SeqId_9204_33	Pro-opiomelanocortin	0.0599161
V2SeqId_9211_19	Pigment epithelium-derived factor	-0.47307
V2SeqId_9212_22	Cathepsin F	0.26938
V2SeqId_9216_100	Plexin-B2	0.0243195
V2SeqId_9231_23	Inositol monophosphatase 3	-0.081542
V2SeqId_9244_27	Palmitoyl-protein thioesterase 1	-0.165818
V2SeqId_9255_5	Interleukin-17C	0.0223248
V2SeqId_9256_78	Neuronal pentraxin-1	0.0906957
V2SeqId_9263_57	Sialate O-acetylesterase	0.0733839
V2SeqId_9266_1	Triggering receptor expressed on myeloid cells 1	0.188946
V2SeqId_9267_2	Carboxypeptidase A4	0.016705
V2SeqId_9278_9		-0.00768005
V2SeqId_9283_8	CD44 antigen	0.124431
V2SeqId_9296_15	Receptor-type tyrosine-protein phosphatase delta	-0.49341
V2SeqId_9297_12	UDP-GlcNAc:betaGal beta-1,3-N-acetylglucosaminyltransferase 8	0.188639
V2SeqId_9312_8	Zinc-alpha-2-glycoprotein	-0.116026
V2SeqId_9313_27	Cerebellin-1	-0.0408149
V2SeqId_9327_3	Ly6/PLAUR domain-containing protein 1	0.00144661
V2SeqId_9343_16	Interleukin-2 receptor subunit beta	-0.202264
V2SeqId_9348_1	Complement C1r subcomponent-like protein	-0.0366938
V2SeqId_9369_174	Leucine-rich repeat-containing protein 4C	0.18556
V2SeqId_9385_4	Lysosomal alpha-glucosidase	-0.0095108
V2SeqId_9386_42	Tetratricopeptide repeat protein 9B	-0.0524747
V2SeqId_9394_19	Carboxypeptidase Q	-0.122441
V2SeqId_9409_11	Tryptase alpha/beta-1	0.134965
V2SeqId_9416_77	Carboxypeptidase M	0.0913991
V2SeqId_9443_137	Cathepsin K	-0.0799156
V2SeqId_9449_150	C4b-binding protein alpha chain	0.0969824
V2SeqId_9459_7	Tumor necrosis factor receptor superfamily member 6	0.347277
V2SeqId_9474_22	Asialoglycoprotein receptor 2	-0.0398059
V2SeqId_9482_110	ADP-ribose pyrophosphatase, mitochondrial	0.0390935
V2SeqId_9484_75	Desmoglein-2	-0.277123
V2SeqId_9504_19	Ras-related protein Rab-27A	-0.0560881
V2SeqId_9518_95	Phospholipase A1 member A	-0.0690408
V2SeqId_9523_34	Integral membrane protein 2C	-0.031602
V2SeqId_9525_1	Inactive tyrosine-protein kinase 7	-1.24903
V2SeqId_9536_16	Epididymal secretory protein E3-alpha	0.0656418
V2SeqId_9544_24	Uncharacterized protein C7orf69	0.0420426
V2SeqId_9573_108	Thioredoxin domain-containing protein 11	-0.00391738
V2SeqId_9578_263	MANSC domain-containing protein 4	-0.0326384
V2SeqId_9579_59	Transmembrane gamma-carboxyglutamic acid protein 4	0.127237
V2SeqId_9580_5	Laminin subunit gamma-2	-0.201531
V2SeqId_9583_17	RING finger protein 24	-0.000330132
V2SeqId_9595_11	Beta-1,4-galactosyltransferase 2	-0.293338
V2SeqId_9607_39	Proline-rich protein 27	0.068755
V2SeqId_9609_25	Zinc finger protein 275	0.0238976
V2SeqId_9638_2	T-cell immunoreceptor with Ig and ITIM domains	0.10072
V2SeqId_9728_4	E3 ubiquitin-protein ligase CCNB1IP1	-0.000961983
V2SeqId_9751_72	Nuclease-sensitive element-binding protein 1	-0.162797
V2SeqId_9759_13	Indoleamine 2,3-dioxygenase 1	0.00211574
V2SeqId_9767_22	Protein ripply1	0.156445
V2SeqId_9774_59	RING finger protein 150	-0.0327455
V2SeqId_9790_28	Serine/threonine-protein kinase BRSK2	0.00051236
V2SeqId_9793_145	Immunoglobulin superfamily DCC subclass member 4	-1.27898
V2SeqId_9826_135	Bis(5'-adenosyl)-triphosphatase	0.00230157
V2SeqId_9834_62	Alcohol dehydrogenase 1B	-0.0929486
V2SeqId_9850_38	Eukaryotic translation initiation factor 1A, X-chromosomal	-0.0974275
V2SeqId_9867_23	Fructose-1,6-bisphosphatase isozyme 2	-0.013648
V2SeqId_9876_20	Fructose-bisphosphate aldolase C	-0.537717
V2SeqId_9883_29	Lactoylglutathione lyase	-0.0617007
V2SeqId_9885_41	Ras-related protein Rap-2a	-0.0202209
V2SeqId_9898_161	AT-rich interactive domain-containing protein 1A	-0.0136456
V2SeqId_9899_28	Kinesin-like protein KIF1C	-0.00191538
V2SeqId_9910_9	S-methyl-5'-thioadenosine phosphorylase	-0.0320174
V2SeqId_9934_29	Phosphatidylinositol transfer protein alpha isoform	-0.139977
V2SeqId_9942_2	NTF2-related export protein 1	-0.00677446
V2SeqId_9956_7	Disintegrin and metalloproteinase domain-containing protein 15	-0.208613
V2SeqId_9957_9	E3 ubiquitin-protein ligase RNF114	-0.0912025
V2SeqId_9963_19	Protocadherin beta-10	-0.0982826
V2SeqId_9964_10	Myocardial zonula adherens protein	0.060552
V2SeqId_9986_14	Neuropeptide W	0.0172469

## Sheet: Table 2. late-life
Table Appendix 2.
seqid_in_sample	Protein name	Effect estimate
V5SeqId_10037_98	Sialic acid-binding Ig-like lectin 12	-0.0953374
V5SeqId_10081_17	DNA-binding protein SATB2	0.0926688
V5SeqId_10428_1	Killer cell immunoglobulin-like receptor 2DS2	0.0558013
V5SeqId_10440_26	CXADR-like membrane protein	-0.105586
V5SeqId_10442_1	Transmembrane protein 190	0.161754
V5SeqId_10445_20	Apolipoprotein M	-0.356714
V5SeqId_10464_6	Anthrax toxin receptor 1	-0.0333254
V5SeqId_10499_1	Transmembrane protein 106A	0.00161327
V5SeqId_10506_53	Membrane-associated progesterone receptor component 2	-0.0897925
V5SeqId_10514_5	Prostaglandin-H2 D-isomerase	0.359317
V5SeqId_10558_26	Protocadherin-9	0.206035
V5SeqId_10561_5	Peptidoglycan recognition protein 3	0.0502329
V5SeqId_10562_42	Neuropilin and tolloid-like protein 2	-0.0346193
V5SeqId_10563_13	LysM and putative peptidoglycan-binding domain-containing protein 3	0.0576365
V5SeqId_10565_19	SLIT and NTRK-like protein 3	0.112982
V5SeqId_10572_65	Cystatin-8	-0.0403776
V5SeqId_10584_7	NADH dehydrogenase [ubiquinone] iron-sulfur protein 4, mitochondrial	-0.00501508
V5SeqId_10620_21	Beta-microseminoprotein	-0.0196839
V5SeqId_10637_50	UPF0577 protein KIAA1324	0.0102454
V5SeqId_10643_16	Noelin-3	0.0889088
V5SeqId_10672_75	Pulmonary surfactant-associated protein B	0.157321
V5SeqId_10748_216	Protocadherin beta-2	-0.10089
V5SeqId_10753_31	Disintegrin and metalloproteinase domain-containing protein 7	-0.0188681
V5SeqId_10798_4	CMRF35-like molecule 2	-0.127543
V5SeqId_10814_7	T-cell surface glycoprotein CD1a	-0.0880555
V5SeqId_10825_12	V-set and immunoglobulin domain-containing protein 10	-0.112043
V5SeqId_10833_64	Hedgehog-interacting protein	-0.194016
V5SeqId_10876_300	BRCA1-associated ATM activator 1	0.0079389
V5SeqId_10885_36	Bombesin receptor-activated protein C6orf89	0.0223008
V5SeqId_10902_53	Retroviral-like aspartic protease 1	0.0417833
V5SeqId_10924_258	Neuferricin	0.0683611
V5SeqId_10939_16	Pleckstrin homology domain-containing family A member 4	0.00832106
V5SeqId_10948_14	Phospholipase D3	0.0583416
V5SeqId_10955_4	C-type lectin domain family 10 member A	0.00481327
V5SeqId_10961_15	Retinoic acid receptor responder protein 3	-0.0437423
V5SeqId_11107_25	Teneurin-3	-0.139423
V5SeqId_11112_18	Protein kish-A	0.0675671
V5SeqId_11129_66	Bone morphogenetic protein 15	0.0108933
V5SeqId_11142_11	Angiopoietin-related protein 1	-0.251222
V5SeqId_11145_72	UPF0606 protein KIAA1549L	0.268498
V5SeqId_11158_40	BICD family-like cargo adapter 1	-0.13421
V5SeqId_11163_7	Protein FAM162B	-0.0263174
V5SeqId_11194_6	Signaling threshold-regulating transmembrane adapter 1	-0.0804641
V5SeqId_11196_31	Collagen alpha-3(VI) chain	-0.258005
V5SeqId_11201_19	tRNA pseudouridine synthase A	0.0122337
V5SeqId_11205_10	Integrin beta-7	-0.0145756
V5SeqId_11208_15	N-acetylglucosamine-1-phosphodiester alpha-N-acetylglucosaminidase	-0.0113021
V5SeqId_11214_40	DnaJ homolog subfamily B member 9	-0.312165
V5SeqId_11229_16	Serine/threonine-protein kinase/endoribonuclease IRE1	-0.00913839
V5SeqId_11243_90	Adhesion G-protein coupled receptor F1	-0.100344
V5SeqId_11258_41	Mucosal addressin cell adhesion molecule 1	0.0738892
V5SeqId_11262_39	TraB domain-containing protein	0.0546581
V5SeqId_11270_17	Coiled-coil-helix-coiled-coil-helix domain-containing protein 10, mitochondrial	0.0726642
V5SeqId_11277_23	Cyclic AMP-dependent transcription factor ATF-6 alpha	-0.076043
V5SeqId_11278_4	Collagen alpha-2(XI) chain	-0.379258
V5SeqId_11283_13	DDB1- and CUL4-associated factor 5	-0.0391528
V5SeqId_11284_24	Leukocyte-associated immunoglobulin-like receptor 1	0.0158349
V5SeqId_11302_237	Tenascin-R	-0.116961
V5SeqId_11324_3	Peroxidasin-like protein	0.0494423
V5SeqId_11387_3	Cyclic AMP-dependent transcription factor ATF-6 beta	0.0285284
V5SeqId_11388_75	WAP four-disulfide core domain protein 2	0.112031
V5SeqId_11416_23	F-box/LRR-repeat protein 4	-0.0715103
V5SeqId_11424_4	Fumarylacetoacetase	-0.171499
V5SeqId_11436_6	Alpha-internexin	-0.0625454
V5SeqId_11462_8	RNA binding protein fox-1 homolog 2	-0.170846
V5SeqId_11468_15	Probable RNA-binding protein 19	-0.0212402
V5SeqId_11510_31	Apolipoprotein L1	-0.222583
V5SeqId_11549_6	Insulin gene enhancer protein ISL-1	0.020182
V5SeqId_11570_94	B-cell receptor-associated protein 29	0.0389675
V5SeqId_11638_42	Beta-1,3-galactosyltransferase 2	0.0363228
V5SeqId_11653_69	Sodium- and chloride-dependent glycine transporter 1	-0.0519871
V5SeqId_11696_7	Cellular retinoic acid-binding protein 2	-0.153876
V5SeqId_11709_29	Carnitine O-palmitoyltransferase 1, muscle isoform	0.0668527
V5SeqId_12033_3	Mitotic checkpoint serine/threonine-protein kinase BUB1	-0.0226976
V5SeqId_12332_7	Eukaryotic elongation factor 2 kinase	-0.0666341
V5SeqId_12338_27	Pikachurin	-0.346617
V5SeqId_12378_71	Tapasin	0.0943032
V5SeqId_12382_2	Probable ATP-dependent RNA helicase DDX58	-0.0109461
V5SeqId_12401_3	AMSH-like protease	0.0529075
V5SeqId_12406_119	GTP-binding protein Di-Ras3	0.00046441
V5SeqId_12417_46	EKC/KEOPS complex subunit TPRKB	0.134426
V5SeqId_12431_13	Protein pelota homolog	-0.0251461
V5SeqId_12433_8	ADP-ribosylation factor-like protein 11	-0.0295444
V5SeqId_12436_84	Glutathione S-transferase omega-1	0.0958495
V5SeqId_12438_127	DNA-3-methyladenine glycosylase	0.201354
V5SeqId_12439_67	Interferon regulatory factor 9	-0.179118
V5SeqId_12458_79	Calcineurin B homologous protein 1	-0.0454864
V5SeqId_12476_50	Fructose-2,6-bisphosphatase TIGAR	-0.0111639
V5SeqId_12483_62	Nuclear receptor ROR-beta	-0.0286321
V5SeqId_12501_10	Tubulin-specific chaperone A	0.0968617
V5SeqId_12504_26	Leiomodin-1	0.0120394
V5SeqId_12509_115	COMM domain-containing protein 1	-0.0727026
V5SeqId_12511_83	Solute carrier family 41 member 2	0.00397866
V5SeqId_12513_8	Glycolipid transfer protein	-0.0508263
V5SeqId_12516_13	Transcriptional enhancer factor TEF-3	-0.00727474
V5SeqId_12528_40	ATPase WRNIP1	0.129085
V5SeqId_12564_9	60S ribosome subunit biogenesis protein NIP7 homolog	0.0108504
V5SeqId_12574_36	Endothelin-2	-0.014904
V5SeqId_12577_100	Flap endonuclease 1	0.0335065
V5SeqId_12618_50	Aldo-keto reductase family 1 member C1	0.0254936
V5SeqId_12623_84	Protein Jumonji	-0.173575
V5SeqId_12625_138	Kelch-like protein 7	0.0858443
V5SeqId_12630_8	Arfaptin-2	0.425137
V5SeqId_12664_19	Tyrosine-protein phosphatase non-receptor type 13	0.265668
V5SeqId_12678_66	U1 small nuclear ribonucleoprotein A	-0.00323169
V5SeqId_12686_15	3-mercaptopyruvate sulfurtransferase	0.0003925
V5SeqId_12700_9	ATP-citrate synthase	0.0354006
V5SeqId_12731_12	Pleckstrin homology domain-containing family A member 7	0.00021045
V5SeqId_12735_39	Cold shock domain-containing protein E1	-0.189485
V5SeqId_12748_6	Bromodomain testis-specific protein	-0.170281
V5SeqId_12763_69	Zinc finger protein 334	0.0513657
V5SeqId_12772_8	Nuclear pore complex protein Nup98-Nup96	-0.00700681
V5SeqId_12781_2	RISC-loading complex subunit TARBP2	0.0305269
V5SeqId_12822_34	Amyloid-beta A4 precursor protein-binding family B member 1	0.0342711
V5SeqId_12827_37	Regulator of G-protein signaling 3	0.00490378
V5SeqId_12830_4	Histone deacetylase complex subunit SAP18	0.0921845
V5SeqId_12854_3	Transcriptional enhancer factor TEF-5	-0.0208985
V5SeqId_12894_3	PAX-interacting protein 1	-0.0238711
V5SeqId_12980_31	Pre-mRNA-splicing factor RBM22	-0.0457076
V5SeqId_12987_12	Serine/arginine-rich splicing factor 7	-0.382767
V5SeqId_13043_157	ATPase family AAA domain-containing protein 2	-0.062905
V5SeqId_13090_17	Protein S100-A6	-0.416179
V5SeqId_13093_6	Secreted and transmembrane protein 1	-0.261849
V5SeqId_13107_9	Ly6/PLAUR domain-containing protein 3	0.120137
V5SeqId_13114_50	Lumican	0.307824
V5SeqId_13119_26	Protein Z-dependent protease inhibitor	0.0578168
V5SeqId_13387_55	ETS homologous factor	0.0288405
V5SeqId_13423_94	Peroxiredoxin-like 2A	-0.012979
V5SeqId_13441_30	Dixin	0.149529
V5SeqId_13449_25	Splicing factor 3B subunit 4	-0.025531
V5SeqId_13464_8	Nutritionally-regulated adipose and cardiac enriched protein homolog	-0.0281956
V5SeqId_13470_43	Parathyroid hormone/parathyroid hormone-related peptide receptor	0.00484126
V5SeqId_13476_16	DNA/RNA-binding protein KIN17	-0.00941994
V5SeqId_13484_69	Collagen alpha-1(I) chain	0.0255003
V5SeqId_13491_40	Retinal rod rhodopsin-sensitive cGMP 3',5'-cyclic phosphodiesterase subunit delta	-0.0122045
V5SeqId_13498_1	Inositol oxygenase	-0.0162096
V5SeqId_13509_5	Secretory carrier-associated membrane protein 5	-0.0476325
V5SeqId_13510_7	Sarcoplasmic/endoplasmic reticulum calcium ATPase 3	0.00507304
V5SeqId_13515_8	Regulation of nuclear pre-mRNA domain-containing protein 1A	0.0253767
V5SeqId_13522_20	Visinin-like protein 1	0.0604186
V5SeqId_13541_1	Myc target protein 1	-0.0501402
V5SeqId_13554_78	Replication initiator 1	-0.190282
V5SeqId_13557_3	Nectin-3	0.0149304
V5SeqId_13612_7	Cytohesin-interacting protein	-0.00426643
V5SeqId_13651_54	E3 ubiquitin-protein ligase ZFP91	0.062696
V5SeqId_13666_222	Carbonic anhydrase-related protein 10	-0.116484
V5SeqId_13686_2	Interleukin-5 receptor subunit alpha	0.0173813
V5SeqId_13688_2	Calcyphosin-like protein	-0.00274554
V5SeqId_13713_164	Vesicle-trafficking protein SEC22a	-0.127006
V5SeqId_13735_1	Rap1 GTPase-activating protein 1	-0.162501
V5SeqId_13743_56	Cullin-4B	0.114207
V5SeqId_13933_276	NGFI-A-binding protein 1	0.0271918
V5SeqId_13937_75	Cullin-associated NEDD8-dissociated protein 1	0.157576
V5SeqId_13940_19	Gamma-interferon-inducible protein 16	-0.14169
V5SeqId_13947_371	Peroxisomal NADH pyrophosphatase NUDT12	0.122696
V5SeqId_13948_50	Gamma-aminobutyric acid type B receptor subunit 2	0.0045415
V5SeqId_13977_28	BRCA1-associated RING domain protein 1	0.0394276
V5SeqId_13978_122	T-box transcription factor TBX3	0.00860664
V5SeqId_14008_22	mRNA-decapping enzyme 1A	-0.0412556
V5SeqId_14012_17	Probable ATP-dependent RNA helicase DHX58	0.0907078
V5SeqId_14026_24	Interleukin-17F	-0.0218102
V5SeqId_14039_33	Kallikrein-5	-0.0262733
V5SeqId_14076_74	Cystatin-S	0.132966
V5SeqId_14136_234	Complement component C1q receptor	-1.0546
V5SeqId_14153_8	Ephrin-A3	-0.222026
V5SeqId_14260_112	Neuroepithelial cell-transforming gene 1 protein	0.0944729
V5SeqId_14331_262	Dynein light chain Tctex-type 1	-0.133557
V5SeqId_14631_22	Dual specificity protein phosphatase 16	-0.0483636
V5SeqId_14634_13	Lutropin-choriogonadotropic hormone receptor	0.0258075
V5SeqId_14655_1	DnaJ homolog subfamily C member 17	-0.255667
V5SeqId_14662_6	Myeloid zinc finger 1	0.267575
V5SeqId_14689_3	Protein SEC13 homolog	0.13014
V5SeqId_15304_1	Regenerating islet-derived protein 3-alpha	0.0792408
V5SeqId_15313_28	Mitotic spindle assembly checkpoint protein MAD2A	0.00622665
V5SeqId_15318_75	Protein S100-A10	0.0872896
V5SeqId_15336_7	Selenoprotein M	0.00063148
V5SeqId_15346_31	Interferon gamma	0.0721378
V5SeqId_15364_101	Apolipoprotein C-I	-0.133662
V5SeqId_15368_3	BMP-binding endothelial regulator protein	-0.0141556
V5SeqId_15374_15	Gastrokine-1	-0.0296012
V5SeqId_15395_15	Glutathione S-transferase Mu 1	-0.175887
V5SeqId_15405_23	Interferon alpha-4	0.00389358
V5SeqId_15412_40	Baculoviral IAP repeat-containing protein 7	0.0968976
V5SeqId_15431_31	Ornithine carbamoyltransferase, mitochondrial	-0.0880691
V5SeqId_15437_11	Receptor activity-modifying protein 3	0.00381132
V5SeqId_15460_9	Dipeptidyl peptidase 4	-0.0146066
V5SeqId_15462_28	T-cell surface glycoprotein CD8 alpha chain	-0.10587
V5SeqId_15471_29	Pancreatic lipase-related protein 2	0.0129243
V5SeqId_15472_16	Low-density lipoprotein receptor-related protein 11	0.0466879
V5SeqId_15486_126	Amiloride-sensitive amine oxidase [copper-containing]	0.0339194
V5SeqId_15495_9	Folate receptor gamma	0.00437046
V5SeqId_15504_39	Baculoviral IAP repeat-containing protein 7	-0.0842241
V5SeqId_15511_37	Neuronal pentraxin receptor	-0.411281
V5SeqId_15513_108	Prostasin	0.0740814
V5SeqId_15514_26	Cholinesterase	0.0802753
V5SeqId_15533_97	Macrophage scavenger receptor types I and II	0.0456363
V5SeqId_15539_15	SLIT and NTRK-like protein 1	-0.146149
V5SeqId_15540_6	Vimentin	-0.0107036
V5SeqId_15544_25	Kallikrein-14	-0.077224
V5SeqId_15558_63	Glutamyl aminopeptidase	-0.0254829
V5SeqId_15560_52	Transcobalamin-2	-0.00482595
V5SeqId_15565_102	Mucin-16	-0.00029678
V5SeqId_15582_25	Ficolin-1	-0.0170145
V5SeqId_15583_18	Fc receptor-like B	-0.00899213
V5SeqId_15589_1	Vitamin D-binding protein	-0.32241
V5SeqId_15602_43	Interleukin-6 receptor subunit alpha	0.115446
V5SeqId_15626_223	Basement membrane-specific heparan sulfate proteoglycan core protein	-0.141282
V5SeqId_15634_139	Slit homolog 1 protein	-0.22058
V5SeqId_15640_54	Transgelin	1.38264
V5SeqId_15666_21	Bone morphogenetic protein 2	0.00293578
V5SeqId_15678_71	Dickkopf-related protein 2	0.0547723
V5SeqId_16070_7	Wnt inhibitory factor 1	-0.145546
V5SeqId_16293_1	Somatoliberin	0.0887028
V5SeqId_16300_4	Triggering receptor expressed on myeloid cells 2	0.0324558
V5SeqId_16302_11	BPI fold-containing family A member 2	0.0402187
V5SeqId_16322_10	Marginal zone B- and B1-cell-specific protein	-0.193487
V5SeqId_16558_2	Myocilin	-0.362431
V5SeqId_16613_3	Cadherin-17	0.00802301
V5SeqId_16616_137	Beta-enolase	-0.0881256
V5SeqId_16763_11	Leukocyte cell-derived chemotaxin-2	-0.00513782
V5SeqId_16770_3	Lithostathine-1-beta	-0.00732821
V5SeqId_16792_4	Sialic acid-binding Ig-like lectin 5	-0.0345246
V5SeqId_16818_200	CUB domain-containing protein 1	0.511624
V5SeqId_16875_13	Protein mago nashi homolog 2	0.0601654
V5SeqId_16899_59	Oxysterol-binding protein-related protein 9	0.054213
V5SeqId_16916_19	SLIT and NTRK-like protein 6	-0.124631
V5SeqId_17137_160	Hemoglobin subunit beta	-0.00688517
V5SeqId_17156_72	Serine/threonine-protein kinase DCLK1	-0.0193867
V5SeqId_17170_15	Calcitonin gene-related peptide 2	-0.102356
V5SeqId_17175_5	Dual specificity mitogen-activated protein kinase kinase 6	0.0076345
V5SeqId_17224_12	Mimecan	0.0181758
V5SeqId_17231_1	Plastin-2	-0.057586
V5SeqId_17326_44	Dual specificity protein phosphatase 23	-0.0138186
V5SeqId_17342_13	Anterior gradient protein 3	-0.00102164
V5SeqId_17346_61	Follicular dendritic cell secreted peptide	-0.119485
V5SeqId_17366_6	DCN1-like protein 1	0.0921313
V5SeqId_17400_71	Acyl-coenzyme A thioesterase 8	-0.0592714
V5SeqId_17410_5	Centrin-3	0.0402525
V5SeqId_17449_23	CD9 antigen	-0.00453297
V5SeqId_17475_18	Lymphokine-activated killer T-cell-originated protein kinase	0.103341
V5SeqId_17509_6	4-hydroxyphenylpyruvate dioxygenase	0.0106205
V5SeqId_17698_15	WW domain-binding protein 2	-0.0977453
V5SeqId_17766_5	Neutrophil cytosol factor 1	0.128049
V5SeqId_17772_7	Ubiquitin D	-0.0138362
V5SeqId_17796_15	Inositol monophosphatase 1	-0.0523414
V5SeqId_17800_33	SCAN domain-containing protein 1	-0.204039
V5SeqId_17811_78	Sulfotransferase 1C2	0.0696518
V5SeqId_17813_21	Valacyclovir hydrolase	-0.202257
V5SeqId_18216_22	Interleukin-11 receptor subunit alpha	0.037727
V5SeqId_18218_48	CB1 cannabinoid receptor-interacting protein 1	-0.0402877
V5SeqId_18241_18	Oxygen-dependent coproporphyrinogen-III oxidase, mitochondrial	-0.0191303
V5SeqId_18257_64	Signal recognition particle 19 kDa protein	-0.00210075
V5SeqId_18268_5	G antigen 2A	-0.0471409
V5SeqId_18282_1	Guanine nucleotide-binding protein G(I)/G(S)/G(O) subunit gamma-11	0.122619
V5SeqId_18304_19	BRCA2 and CDKN1A-interacting protein	0.0683689
V5SeqId_18323_39	Dihydropyrimidinase-related protein 1	-0.0413789
V5SeqId_18326_50	Melanoma-associated antigen 8	-0.0730434
V5SeqId_18483_36	Guanine nucleotide exchange factor MSS4	0.00752109
V5SeqId_18880_81	Collagen alpha-1(III) chain	-0.245812
V5SeqId_18881_7	CD97 antigen	0.147943
V5SeqId_18886_28	Down syndrome cell adhesion molecule-like protein 1	-0.035391
V5SeqId_18893_26	Adhesion G-protein coupled receptor G1	0.419871
V5SeqId_18922_27	Macrosialin	0.178316
V5SeqId_18932_84	Nicotinamide/nicotinic acid mononucleotide adenylyltransferase 1	-0.0249864
V5SeqId_19109_32	Transcription elongation factor A protein-like 8	-0.123401
V5SeqId_19126_4	Regulation of nuclear pre-mRNA domain-containing protein 1B	0.0645382
V5SeqId_19144_9	Transcription factor 4	-0.0448545
V5SeqId_19267_14	Hydroxyacylglutathione hydrolase, mitochondrial	-0.0184611
V5SeqId_19273_3	Glutathione reductase, mitochondrial	-0.109687
V5SeqId_19290_5	Hypoxanthine-guanine phosphoribosyltransferase	-0.0816164
V5SeqId_19311_15	Gamma-crystallin S	0.0422691
V5SeqId_19323_1	Receptor-binding cancer antigen expressed on SiSo cells	0.0135299
V5SeqId_19329_31	Homeodomain-interacting protein kinase 3	0.333458
V5SeqId_19366_8	Peroxisome assembly protein 26	0.118785
V5SeqId_19369_17	Histone acetyltransferase KAT2A	0.0763419
V5SeqId_19372_7	MAM domain-containing glycosylphosphatidylinositol anchor protein 2	0.118006
V5SeqId_19377_14	Noelin-2	-0.0557134
V5SeqId_19488_1	Programmed cell death protein 6	0.0627423
V5SeqId_19511_8	DCN1-like protein 2	-0.154909
V5SeqId_19575_4	Erythropoietin receptor	0.0364491
V5SeqId_19601_15	Ankyrin repeat and SOCS box protein 9	0.0646844
V5SeqId_19606_28	Indian hedgehog protein	-0.0050584
V5SeqId_19639_53	Islet amyloid polypeptide	0.228269
V5SeqId_2212_69	Tissue-type plasminogen activator	0.219345
V5SeqId_2468_62	C-C motif chemokine 20	-0.0234474
V5SeqId_2475_1	Mast/stem cell growth factor receptor Kit	-0.571428
V5SeqId_2516_57	C-C motif chemokine 21	-0.387497
V5SeqId_2637_77	Macrophage mannose receptor 1	0.527708
V5SeqId_2658_27	NT-3 growth factor receptor	0.156593
V5SeqId_2677_1	Epidermal growth factor receptor	-0.236273
V5SeqId_2681_23	Hepatocyte growth factor	-0.0306707
V5SeqId_2687_2	Melanoma-derived growth regulatory protein	0.0929327
V5SeqId_2692_74	Phospholipase A2, membrane associated	-0.425327
V5SeqId_2714_78	Aminoacyl tRNA synthase complex-interacting multifunctional protein 1	-0.175963
V5SeqId_2737_22	CCN family member 3	0.163048
V5SeqId_2773_50	Interleukin-10	-0.0465639
V5SeqId_2813_11	Agouti-related protein	-0.274182
V5SeqId_2826_53	Ectodysplasin-A	-0.322764
V5SeqId_2831_29	Kallikrein-11	-0.024487
V5SeqId_2834_54	Kallikrein-8	-0.257262
V5SeqId_2849_49	Allograft inflammatory factor 1	-0.0507892
V5SeqId_2860_19	Importin subunit alpha-1	-0.0230132
V5SeqId_2889_37	Cardiotrophin-1	0.0131792
V5SeqId_2925_9	Plasminogen activator inhibitor 1	-0.0144109
V5SeqId_2939_10	Artemin	-0.176054
V5SeqId_2953_31	Glycoprotein hormones alpha chain|Lutropin subunit beta	-0.0783078
V5SeqId_2962_50	Parathyroid hormone-related protein	0.412301
V5SeqId_2985_35	Growth-regulated alpha protein	0.0157142
V5SeqId_2991_9	Interleukin-1 receptor type 1	0.0632058
V5SeqId_2997_8	Junctional adhesion molecule B	-0.00778224
V5SeqId_3022_4	Cytotoxic T-lymphocyte protein 4	-0.0168563
V5SeqId_3025_50	Fibroblast growth factor 2	-0.0122612
V5SeqId_3045_72	Pleiotrophin	2.15934
V5SeqId_3066_12	Galectin-3	0.0199676
V5SeqId_3082_9	UL16-binding protein 2	0.0848223
V5SeqId_3143_3	T-cell surface glycoprotein CD4	0.0913392
V5SeqId_3168_8	A disintegrin and metalloproteinase with thrombospondin motifs 5	0.0723778
V5SeqId_3175_51	A disintegrin and metalloproteinase with thrombospondin motifs 13	-0.2318
V5SeqId_3198_4	Iduronate 2-sulfatase	0.421325
V5SeqId_3216_2	Polymeric immunoglobulin receptor	-0.0353743
V5SeqId_3221_54	Secreted frizzled-related protein 1	-0.22163
V5SeqId_3232_28	Tartrate-resistant acid phosphatase type 5	-0.532797
V5SeqId_3234_23	Coiled-coil domain-containing protein 80	0.426657
V5SeqId_3294_55	Cryptic protein	0.180956
V5SeqId_3296_92	Contactin-2	0.0603007
V5SeqId_3302_58	Cystatin-F	0.10354
V5SeqId_3310_62	Low affinity immunoglobulin gamma Fc region receptor II-b	-0.01555
V5SeqId_3314_74	GDNF family receptor alpha-1	-0.210562
V5SeqId_3327_27	Netrin-4	-0.98844
V5SeqId_3357_67	Cyclin-A2|Cyclin-dependent kinase 2	-0.0112501
V5SeqId_3361_26	C-type lectin domain family 4 member K	0.129021
V5SeqId_3362_61	Chordin-like protein 1	2.24813
V5SeqId_3365_7	Dickkopf-related protein 4	0.125348
V5SeqId_3366_51	Extracellular matrix protein 1	-0.471602
V5SeqId_3376_49	Interleukin-17 receptor D	-0.0185938
V5SeqId_3378_49	Kallikrein-7	-0.516817
V5SeqId_3388_58	Serine/threonine-protein kinase PAK 5	-0.182599
V5SeqId_3396_54	Renin	0.112031
V5SeqId_3415_61	Bone sialoprotein 2	-0.0438144
V5SeqId_3427_63	Casein kinase II subunit alpha	0.0852922
V5SeqId_3431_54	Ephrin type-A receptor 1	0.0119626
V5SeqId_3434_34	Fibronectin	0.254689
V5SeqId_3448_13	Insulin receptor	0.0743029
V5SeqId_3449_58	Kallistatin	0.0472019
V5SeqId_3484_60	Angiotensinogen	0.278025
V5SeqId_3486_58	Fibroblast growth factor 1	-0.0986498
V5SeqId_3505_6	Lymphotoxin-alpha|Lymphotoxin-beta	-0.538315
V5SeqId_3581_53	Alpha-2-HS-glycoprotein	-0.203104
V5SeqId_3585_54	Basigin	-0.170823
V5SeqId_3607_71	Dickkopf-related protein 3	0.0937286
V5SeqId_3616_3	N-acetylglucosamine-6-sulfatase	0.0395925
V5SeqId_3617_80	Hepatocyte growth factor activator	0.0010739
V5SeqId_3710_49	Plasminogen	-0.192091
V5SeqId_3795_6	Disintegrin and metalloproteinase domain-containing protein 9	-0.0241757
V5SeqId_3799_11	Carbonic anhydrase 3	0.072162
V5SeqId_3803_10	Cystatin-D	0.0707794
V5SeqId_3807_1	Fibroblast growth factor 23	-0.131485
V5SeqId_3825_18	Mitogen-activated protein kinase 8	-0.0236663
V5SeqId_4123_60	Fibroblast growth factor 4	0.0254628
V5SeqId_4125_52	Advanced glycosylation end product-specific receptor	-0.152495
V5SeqId_4143_74	Lymphotactin	0.0484402
V5SeqId_4145_58	Neurotrophin-3	-0.336341
V5SeqId_4150_75	Plasminogen	-0.242397
V5SeqId_4151_6	Plasminogen	-0.891734
V5SeqId_4152_58	Plasma kallikrein	-0.228705
V5SeqId_4153_11	Alpha-1-antichymotrypsin	-0.0558529
V5SeqId_4158_54	Urokinase-type plasminogen activator	-0.130508
V5SeqId_4322_28	Protein amnionless	0.0190695
V5SeqId_4324_33	Cystatin-SA	0.0171122
V5SeqId_4337_49	C-reactive protein	-0.00023437
V5SeqId_4359_87	Dual specificity tyrosine-phosphorylation-regulated kinase 3	0.032421
V5SeqId_4374_45	Growth/differentiation factor 15	0.0611635
V5SeqId_4392_54	Fibroblast growth factor 12	-0.0405295
V5SeqId_4407_10	Hepatocyte growth factor-like protein	-0.0425802
V5SeqId_4413_3	Antileukoproteinase	0.352306
V5SeqId_4455_89	Lactadherin	-0.12194
V5SeqId_4496_60	Macrophage metalloelastase	0.492916
V5SeqId_4541_49	Cell adhesion molecule-related/down-regulated by oncogenes	-0.355905
V5SeqId_4549_78	Alpha-(1,3)-fucosyltransferase 5	-0.131894
V5SeqId_4551_72	Adhesion G-protein coupled receptor G5	-0.0747668
V5SeqId_4588_1	Pancreatic prohormone	0.196581
V5SeqId_4673_13	Interleukin-6	-0.170677
V5SeqId_4763_31	Afamin	0.394076
V5SeqId_4769_10	Olfactomedin-4	-0.231178
V5SeqId_4785_30	Corticosteroid-binding globulin	0.00459443
V5SeqId_4801_13	Lactoperoxidase	-0.0560424
V5SeqId_4811_33	Inter-alpha-trypsin inhibitor heavy chain H4	-0.411013
V5SeqId_4891_50	Glucagon	-0.429649
V5SeqId_4916_2	Immunoglobulin heavy constant delta	-0.0419348
V5SeqId_4930_21	Stanniocalcin-1	0.167417
V5SeqId_4961_17	Annexin A2	0.0674176
V5SeqId_4982_54	Elafin	0.00938912
V5SeqId_5021_13	Inorganic pyrophosphatase	0.0777164
V5SeqId_5034_79	Trypsin-2	0.0609463
V5SeqId_5062_60	CD226 antigen	-0.209513
V5SeqId_5065_8	CD83 antigen	-0.0451337
V5SeqId_5087_5	Interleukin-22 receptor subunit alpha-2	-0.198457
V5SeqId_5100_53	Lysosome membrane protein 2	0.0131603
V5SeqId_5108_72	Neurogenic locus notch homolog protein 3	1.32878
V5SeqId_5124_69	Intercellular adhesion molecule 5	-0.0487536
V5SeqId_5178_5	High affinity cAMP-specific 3',5'-cyclic phosphodiesterase 7A	-0.0438579
V5SeqId_5249_31	Serine/threonine-protein kinase 17B	0.00373081
V5SeqId_5268_49	Matrix metalloproteinase-16	-0.0871465
V5SeqId_5307_12	Coagulation factor IX	0.0728885
V5SeqId_5337_64	T-lymphocyte activation antigen CD86	-0.0282241
V5SeqId_5363_51	Semaphorin-3E	0.473918
V5SeqId_5364_7	Protein SET	-0.473277
V5SeqId_5437_63	Fatty acid-binding protein, heart	-0.161662
V5SeqId_5440_26	Troponin I, fast skeletal muscle	-0.00850215
V5SeqId_5443_62	Natriuretic peptides A	0.0605744
V5SeqId_5463_22	Growth arrest-specific protein 1	-0.0758668
V5SeqId_5491_12	Testican-2	-0.0600584
V5SeqId_5508_62	Cathepsin D	0.0300588
V5SeqId_5534_49	Tumor necrosis factor receptor superfamily member 10B	-0.0132532
V5SeqId_5590_11	Zona pellucida-like domain-containing protein 1	0.110278
V5SeqId_5599_88	Prenylcysteine oxidase-like	-0.353782
V5SeqId_5602_62	Inactive ribonuclease-like protein 10	-0.157217
V5SeqId_5610_32	Protein FAM171A1	0.125843
V5SeqId_5621_64	Thrombospondin type-1 domain-containing protein 1	-0.159729
V5SeqId_5631_83	Promotilin	0.073198
V5SeqId_5632_6	Cartilage acidic protein 1	0.761184
V5SeqId_5637_81	Netrin-G1	-0.0248579
V5SeqId_5648_28	Chymotrypsinogen B2	0.0370365
V5SeqId_5676_54	Agouti-signaling protein	0.0640446
V5SeqId_5677_15	Uncharacterized protein C2orf66	-0.0820635
V5SeqId_5682_13	Vasorin	-0.618718
V5SeqId_5687_5	Glucosidase 2 subunit beta	-0.319041
V5SeqId_5689_1	Beta-defensin 112	-0.00838567
V5SeqId_5690_49	Tuftelin	0.194144
V5SeqId_5698_60	Tenascin-X	-0.0619745
V5SeqId_5735_54	C1GALT1-specific chaperone 1	-0.0272932
V5SeqId_5740_17	Roundabout homolog 1	-0.17819
V5SeqId_5867_60	Arginase-1	0.00564632
V5SeqId_5980_55	BolA-like protein 3	-0.0130841
V5SeqId_5988_49	Tumor necrosis factor ligand superfamily member 14	-0.0293996
V5SeqId_6060_2	Prolactin-inducible protein	-0.0162939
V5SeqId_6081_52	Procollagen C-endopeptidase enhancer 2	-0.301222
V5SeqId_6103_70	Fc receptor-like protein 5	0.0424566
V5SeqId_6107_3	Chymotrypsin-like elastase family member 1	-0.404775
V5SeqId_6223_5	Guanylate cyclase activator 2B	-0.0302194
V5SeqId_6228_58	Sperm acrosome membrane-associated protein 1	-0.0649193
V5SeqId_6351_55	B-cell antigen receptor complex-associated protein beta chain	0.0628633
V5SeqId_6367_66	Fibromodulin	-0.481184
V5SeqId_6373_54		0.117792
V5SeqId_6385_63	von Willebrand factor A domain-containing protein 1	-0.00707413
V5SeqId_6392_7	WNT1-inducible-signaling pathway protein 2	1.83301
V5SeqId_6399_52	Beta-defensin 107	0.0131768
V5SeqId_6402_8	Paired immunoglobulin-like type 2 receptor alpha	-0.00146133
V5SeqId_6408_2	Inhibin beta C chain	0.357803
V5SeqId_6430_36	Chemokine-like protein TAFA-2	0.0282127
V5SeqId_6434_18	Retina-specific copper amine oxidase	0.0995781
V5SeqId_6442_6	B melanoma antigen 3	0.170583
V5SeqId_6447_73	Pentraxin-related protein PTX3	0.0592208
V5SeqId_6455_52	Hyaluronan and proteoglycan link protein 4	-0.0472669
V5SeqId_6471_53	Complement factor H-related protein 4	-0.00425783
V5SeqId_6472_40	Melanocyte protein PMEL	-0.16793
V5SeqId_6485_59	Immunoglobulin lambda-like polypeptide 1	-0.120936
V5SeqId_6493_9	Carboxypeptidase Z	-0.0631219
V5SeqId_6496_60	Protein delta homolog 1	0.122411
V5SeqId_6497_10	Retinoschisin	-0.189314
V5SeqId_6510_56	E3 ubiquitin-protein ligase RNF128	-0.0278935
V5SeqId_6533_20	Deoxyribonuclease-2-beta	0.111491
V5SeqId_6549_60	V-set and transmembrane domain-containing protein 2-like protein	0.0962556
V5SeqId_6556_5	Ectonucleotide pyrophosphatase/phosphodiesterase family member 5	-0.167864
V5SeqId_6557_50	Leucine-rich repeat-containing protein 15	0.0591668
V5SeqId_6597_24	Membrane protein FAM174A	0.0108349
V5SeqId_6649_51	Netrin-1	0.270168
V5SeqId_6917_49	Leucine-rich repeat-containing protein 3	-0.00456533
V5SeqId_6920_1	GDNF family receptor alpha-like	0.0641126
V5SeqId_6936_7	Protein TMEPAI	-0.0183869
V5SeqId_6947_4	Type 2 lactosamine alpha-2,3-sialyltransferase	-0.0579355
V5SeqId_6948_82	Polyphosphoinositide phosphatase	0.0391406
V5SeqId_6986_17	Heparan sulfate glucosamine 3-O-sulfotransferase 3B1	0.0144943
V5SeqId_7015_8	Leukocyte immunoglobulin-like receptor subfamily B member 5	-0.12469
V5SeqId_7064_2	Vesicle-associated membrane protein 8	0.0118686
V5SeqId_7148_42	Protein N-lysine methyltransferase FAM173A	-0.00730423
V5SeqId_7156_2	Alpha-(1,3)-fucosyltransferase 10	0.0609921
V5SeqId_7163_26	Extracellular glycoprotein lacritin	-0.0979005
V5SeqId_7179_69	Neurofascin	0.0269989
V5SeqId_7181_17	Vesicle-associated membrane protein-associated protein B/C	0.0313021
V5SeqId_7196_21	Interferon omega-1	0.00338796
V5SeqId_7211_2	Ribonuclease pancreatic	0.0968773
V5SeqId_7215_18	NADH-cytochrome b5 reductase 3	0.00146308
V5SeqId_7224_11	T-cell receptor-associated transmembrane adapter 1	0.0195636
V5SeqId_7247_1	RAB6-interacting golgin	-0.147734
V5SeqId_7251_64	Complement C1q tumor necrosis factor-related protein 3	0.448617
V5SeqId_7655_11	Natriuretic peptides B	0.081768
V5SeqId_7737_76	Integrin beta-6	0.0886497
V5SeqId_7778_104	Caspase recruitment domain-containing protein 19	-0.0156234
V5SeqId_7808_5	D-glucuronyl C5-epimerase	-0.139538
V5SeqId_7809_22	Spermatogenesis-associated protein 9	0.0329287
V5SeqId_7813_6	Alkaline phosphatase, placental type	-0.0144018
V5SeqId_7826_1	Serine/threonine-protein kinase DCLK3	0.0566205
V5SeqId_7857_22	Neurotensin/neuromedin N	-0.152113
V5SeqId_7861_9	Tyrosine-protein kinase transmembrane receptor ROR2	-0.00608042
V5SeqId_7863_50	Membrane-associated progesterone receptor component 1	-0.336856
V5SeqId_7865_126	HRAS-like suppressor 3	-0.0531922
V5SeqId_7918_114	Alpha-amylase 1	0.044371
V5SeqId_7923_41	Semaphorin-4C	-0.200619
V5SeqId_7934_11	Protein NDRG4	0.0325916
V5SeqId_7943_16	CUB and zona pellucida-like domain-containing protein 1	-0.0275285
V5SeqId_7945_10	Semaphorin-6A	0.00324145
V5SeqId_7953_20	Signaling lymphocytic activation molecule	-0.174151
V5SeqId_7956_11	MICOS complex subunit MIC10	0.0714325
V5SeqId_7970_315	Ecto-ADP-ribosyltransferase 3	-0.305411
V5SeqId_7989_5	Uncharacterized protein C1orf226	0.0430756
V5SeqId_7997_118	Double C2-like domain-containing protein beta	-0.104312
V5SeqId_8000_17	Killer cell immunoglobulin-like receptor 2DL5A	-0.0046592
V5SeqId_8003_57	Leucine-rich repeat LGI family member 3	-0.0321222
V5SeqId_8016_19	DnaJ homolog subfamily C member 4	0.132016
V5SeqId_8017_23	FAD-dependent oxidoreductase domain-containing protein 1	-0.0116277
V5SeqId_8051_10	Angiogenic factor with G patch and FHA domains 1	0.00998937
V5SeqId_8053_16	DnaJ homolog subfamily B member 14	0.0514525
V5SeqId_8059_1	Thrombopoietin	-0.0303122
V5SeqId_8060_7	Pro-neuregulin-2, membrane-bound isoform	0.225448
V5SeqId_8093_13	Myogenesis-regulating glycosidase	-0.0237998
V5SeqId_8231_122	Vascular endothelial growth factor receptor 1	-0.0907066
V5SeqId_8249_124	ALK tyrosine kinase receptor	-0.104824
V5SeqId_8250_2	Receptor-type tyrosine-protein phosphatase eta	-0.557878
V5SeqId_8258_22	UDP-glucuronic acid decarboxylase 1	-0.284758
V5SeqId_8263_64	TYMS opposite strand protein	0.00106244
V5SeqId_8265_225	Lamina-associated polypeptide 2, isoforms beta/gamma	-0.0434539
V5SeqId_8272_22	3-keto-steroid reductase	0.0230125
V5SeqId_8289_8	Transmembrane glycoprotein NMB	0.0929621
V5SeqId_8297_8	DnaJ homolog subfamily C member 10	0.27349
V5SeqId_8304_50	Tumor necrosis factor receptor superfamily member 11B	0.349773
V5SeqId_8305_18	Extracellular sulfatase Sulf-2	0.108585
V5SeqId_8323_163	Trefoil factor 3	-0.0518885
V5SeqId_8337_65	Receptor-type tyrosine-protein phosphatase U	0.145958
V5SeqId_8346_9	Dipeptidyl peptidase 2	0.0277385
V5SeqId_8347_222	Beta-defensin 129	-0.0586252
V5SeqId_8351_17	Serine protease 57	-0.354262
V5SeqId_8353_15	Sodium channel subunit beta-2	0.0345939
V5SeqId_8355_80	Isthmin-1	0.00799427
V5SeqId_8356_88	Oxytocin-neurophysin 1	-0.187043
V5SeqId_8357_43	Sulfotransferase 4A1	-0.0155947
V5SeqId_8372_29	Cadherin-related family member 1	0.243786
V5SeqId_8378_3	Protein LDOC1	0.112607
V5SeqId_8391_12	Beta-defensin 115	0.0252508
V5SeqId_8394_56	Non-secretory ribonuclease	-0.0567071
V5SeqId_8396_42	Fatty-acid amide hydrolase 2	-0.00851165
V5SeqId_8397_147	Sulfhydryl oxidase 2	0.0138665
V5SeqId_8427_118	R-spondin-3	0.175605
V5SeqId_8447_11	Appetite-regulating hormone	-0.30579
V5SeqId_8450_36	Pituitary adenylate cyclase-activating polypeptide	-0.0123915
V5SeqId_8462_18	Somatotropin	-0.17393
V5SeqId_8464_31	R-spondin-4	0.579396
V5SeqId_8480_29	EGF-containing fibulin-like extracellular matrix protein 1	0.621632
V5SeqId_8646_61	Leucine-rich repeat transmembrane neuronal protein 4	0.0864502
V5SeqId_8697_38	Glypican-1	-0.120532
V5SeqId_8767_44	Endothelin-converting enzyme 1	0.0234072
V5SeqId_8803_61	Nectin-1	0.217685
V5SeqId_8818_13	Interferon gamma receptor 2	0.0360517
V5SeqId_8839_4	Metaxin-2	0.109537
V5SeqId_8841_65	Cartilage intermediate layer protein 2	-0.19533
V5SeqId_8874_53	Ceroid-lipofuscinosis neuronal protein 5	0.315504
V5SeqId_8890_9	Transmembrane protein 132B	-0.291385
V5SeqId_8924_55	Neuron-specific vesicular protein calcyon	0.0192169
V5SeqId_8950_4	Calcium-activated chloride channel regulator 2	0.114888
V5SeqId_8954_30	Mitogen-activated protein kinase kinase kinase kinase 1	-0.108244
V5SeqId_8956_96	Scavenger receptor class F member 2	1.20935
V5SeqId_8970_9	Receptor-interacting serine/threonine-protein kinase 2	0.0975946
V5SeqId_8974_172	Collagen alpha-1(XV) chain	-1.46688
V5SeqId_8991_115	Fc receptor-like protein 4	-0.0131102
V5SeqId_9004_24	Low-density lipoprotein receptor class A domain-containing protein 4	0.121606
V5SeqId_9018_38	Protocadherin-10	0.193312
V5SeqId_9026_40	Butyrophilin-like protein 8	-0.0913573
V5SeqId_9032_30	Proto-oncogene tyrosine-protein kinase ROS	0.00041847
V5SeqId_9051_13	Interleukin-32	-0.00130075
V5SeqId_9059_14	Rap guanine nucleotide exchange factor 5	0.0070101
V5SeqId_9068_17	Janus kinase and microtubule-interacting protein 3	-0.00014586
V5SeqId_9076_25	Proenkephalin-A	0.307095
V5SeqId_9116_28	HEPACAM family member 2	0.005954
V5SeqId_9170_24	Interleukin-17A	0.286405
V5SeqId_9172_69	Neutrophil collagenase	-0.143496
V5SeqId_9177_6	Protein FAM3B	-0.0555333
V5SeqId_9185_15	Trefoil factor 1	0.0701129
V5SeqId_9196_8	Galectin-7	0.0265503
V5SeqId_9212_22	Cathepsin F	0.0861607
V5SeqId_9237_54	Lysosomal acid phosphatase	0.0316352
V5SeqId_9244_27	Palmitoyl-protein thioesterase 1	-0.14681
V5SeqId_9251_28	Epididymis-specific alpha-mannosidase	-0.00677186
V5SeqId_9256_78	Neuronal pentraxin-1	-0.0297528
V5SeqId_9282_12	Cysteine-rich secretory protein 2	0.135156
V5SeqId_9296_15	Receptor-type tyrosine-protein phosphatase delta	-0.0841114
V5SeqId_9297_12	UDP-GlcNAc:betaGal beta-1,3-N-acetylglucosaminyltransferase 8	0.00809171
V5SeqId_9306_7	Beta-defensin 118	-0.0874906
V5SeqId_9343_16	Interleukin-2 receptor subunit beta	-0.0566865
V5SeqId_9409_11	Tryptase alpha/beta-1	0.046687
V5SeqId_9459_7	Tumor necrosis factor receptor superfamily member 6	0.142368
V5SeqId_9470_15	Methyltransferase-like protein 24	0.229815
V5SeqId_9474_22	Asialoglycoprotein receptor 2	-0.0187954
V5SeqId_9486_13	Beta-defensin 125	0.00070297
V5SeqId_9511_61	Neurexophilin-2	-0.0134828
V5SeqId_9523_34	Integral membrane protein 2C	0.23307
V5SeqId_9525_1	Inactive tyrosine-protein kinase 7	-0.275121
V5SeqId_9531_24	Leukocyte-specific transcript 1 protein	0.153536
V5SeqId_9536_16	Epididymal secretory protein E3-alpha	0.00286712
V5SeqId_9582_93	Sushi domain-containing protein 1	-0.0725662
V5SeqId_9595_11	Beta-1,4-galactosyltransferase 2	-0.494058
V5SeqId_9719_145	Matrix metalloproteinase-16	-0.0777791
V5SeqId_9745_20	Eukaryotic translation initiation factor 4E type 2	0.0557876
V5SeqId_9748_31	Glutathione S-transferase Mu 3	-0.0204482
V5SeqId_9774_59	RING finger protein 150	-0.0535219
V5SeqId_9793_145	Immunoglobulin superfamily DCC subclass member 4	-0.494037
V5SeqId_9826_135	Bis(5'-adenosyl)-triphosphatase	-0.0127473
V5SeqId_9834_62	Alcohol dehydrogenase 1B	0.00235933
V5SeqId_9850_38	Eukaryotic translation initiation factor 1A, X-chromosomal	-0.0211759
V5SeqId_9867_23	Fructose-1,6-bisphosphatase isozyme 2	-0.0547478
V5SeqId_9870_17	Tryptophan--tRNA ligase, cytoplasmic	0.092105
V5SeqId_9875_107	THO complex subunit 1	0.100578
V5SeqId_9885_41	Ras-related protein Rap-2a	-0.0411827
V5SeqId_9889_42	Actin filament-associated protein 1-like 1	-0.0482753
V5SeqId_9897_9	DNA replication licensing factor MCM6	0.0577472
V5SeqId_9928_125	Leukocyte cell-derived chemotaxin 1	0.0830665
V5SeqId_9931_20	Keratin, type II cytoskeletal 1	0.0614888
V5SeqId_9942_2	NTF2-related export protein 1	-0.222594
V5SeqId_9950_229	Lymphocyte activation gene 3 protein	0.114052

## Sheet: Table 3. Overlapping
Table Appendix 3.
seqid_in_sample	Protein name	Effect estimate midlife	Effect estimate late-life
SeqId_10442_1	Transmembrane protein 190	0.068922	0.161754
SeqId_10445_20	Apolipoprotein M	-0.36413	-0.35671
SeqId_10506_53	Membrane-associated progesterone receptor component 2	-0.09361	-0.08979
SeqId_10514_5	Prostaglandin-H2 D-isomerase	1.09632	0.359317
SeqId_10558_26	Protocadherin-9	0.5725	0.206035
SeqId_10565_19	SLIT and NTRK-like protein 3	0.121667	0.112982
SeqId_10643_16	Noelin-3	0.036516	0.088909
SeqId_10798_4	CMRF35-like molecule 2	-0.00807	-0.12754
SeqId_10961_15	Retinoic acid receptor responder protein 3	-0.16647	-0.04374
SeqId_11112_18	Protein kish-A	0.003385	0.067567
SeqId_11142_11	Angiopoietin-related protein 1	-0.00884	-0.25122
SeqId_11158_40	BICD family-like cargo adapter 1	-0.00145	-0.13421
SeqId_11196_31	Collagen alpha-3(VI) chain	-0.74247	-0.258
SeqId_11205_10	Integrin beta-7	-0.00162	-0.01458
SeqId_11208_15	N-acetylglucosamine-1-phosphodiester alpha-N-acetylglucosaminidase	-0.17202	-0.0113
SeqId_11214_40	DnaJ homolog subfamily B member 9	-0.71747	-0.31217
SeqId_11262_39	TraB domain-containing protein	-0.04833	0.054658
SeqId_11278_4	Collagen alpha-2(XI) chain	-0.01119	-0.37926
SeqId_11284_24	Leukocyte-associated immunoglobulin-like receptor 1	0.200337	0.015835
SeqId_11302_237	Tenascin-R	-0.18714	-0.11696
SeqId_11387_3	Cyclic AMP-dependent transcription factor ATF-6 beta	0.510633	0.028528
SeqId_11388_75	WAP four-disulfide core domain protein 2	0.433274	0.112031
SeqId_11424_4	Fumarylacetoacetase	-0.26112	-0.1715
SeqId_11436_6	Alpha-internexin	-0.10526	-0.06255
SeqId_11468_15	Probable RNA-binding protein 19	-0.0378	-0.02124
SeqId_11510_31	Apolipoprotein L1	-0.33988	-0.22258
SeqId_11570_94	B-cell receptor-associated protein 29	0.117958	0.038968
SeqId_11638_42	Beta-1,3-galactosyltransferase 2	0.048202	0.036323
SeqId_12332_7	Eukaryotic elongation factor 2 kinase	-0.00726	-0.06663
SeqId_12378_71	Tapasin	0.039316	0.094303
SeqId_12406_119	GTP-binding protein Di-Ras3	0.017539	0.000464
SeqId_12417_46	EKC/KEOPS complex subunit TPRKB	0.400859	0.134426
SeqId_12431_13	Protein pelota homolog	-0.00034	-0.02515
SeqId_12439_67	Interferon regulatory factor 9	-0.00164	-0.17912
SeqId_12458_79	Calcineurin B homologous protein 1	0.014247	-0.04549
SeqId_12509_115	COMM domain-containing protein 1	-0.01278	-0.0727
SeqId_12630_8	Arfaptin-2	0.94086	0.425137
SeqId_12686_15	3-mercaptopyruvate sulfurtransferase	0.143418	0.000392
SeqId_12772_8	Nuclear pore complex protein Nup98-Nup96	-0.09881	-0.00701
SeqId_12987_12	Serine/arginine-rich splicing factor 7	-0.2118	-0.38277
SeqId_13043_157	ATPase family AAA domain-containing protein 2	-0.09826	-0.06291
SeqId_13090_17	Protein S100-A6	-0.11126	-0.41618
SeqId_13114_50	Lumican	1.4767	0.307823
SeqId_13423_94	Peroxiredoxin-like 2A	-0.00114	-0.01298
SeqId_13441_30	Dixin	-0.02499	0.149529
SeqId_13464_8	Nutritionally-regulated adipose and cardiac enriched protein homolog	0.015366	-0.0282
SeqId_13470_43	Parathyroid hormone/parathyroid hormone-related peptide receptor	0.045324	0.004841
SeqId_13476_16	DNA/RNA-binding protein KIN17	-0.0236	-0.00942
SeqId_13498_1	Inositol oxygenase	-0.04938	-0.01621
SeqId_13509_5	Secretory carrier-associated membrane protein 5	0.008722	-0.04763
SeqId_13651_54	E3 ubiquitin-protein ligase ZFP91	-0.04377	0.062696
SeqId_13666_222	Carbonic anhydrase-related protein 10	-0.17399	-0.11648
SeqId_13686_2	Interleukin-5 receptor subunit alpha	0.090759	0.017381
SeqId_13713_164	Vesicle-trafficking protein SEC22a	-0.03969	-0.12701
SeqId_13743_56	Cullin-4B	0.103697	0.114207
SeqId_13940_19	Gamma-interferon-inducible protein 16	-0.0658	-0.14169
SeqId_13978_122	T-box transcription factor TBX3	0.01559	0.008607
SeqId_14012_17	Probable ATP-dependent RNA helicase DHX58	0.109701	0.090708
SeqId_14026_24	Interleukin-17F	-0.0313	-0.02181
SeqId_14136_234	Complement component C1q receptor	-2.08789	-1.0546
SeqId_14153_8	Ephrin-A3	-0.01155	-0.22203
SeqId_14634_13	Lutropin-choriogonadotropic hormone receptor	0.006745	0.025808
SeqId_14655_1	DnaJ homolog subfamily C member 17	-0.08297	-0.25567
SeqId_14689_3	Protein SEC13 homolog	0.4015	0.13014
SeqId_15304_1	Regenerating islet-derived protein 3-alpha	0.167265	0.079241
SeqId_15318_75	Protein S100-A10	0.039136	0.08729
SeqId_15336_7	Selenoprotein M	0.072192	0.000631
SeqId_15412_40	Baculoviral IAP repeat-containing protein 7	0.004929	0.096898
SeqId_15437_11	Receptor activity-modifying protein 3	0.018616	0.003811
SeqId_15460_9	Dipeptidyl peptidase 4	0.087108	-0.01461
SeqId_15462_28	T-cell surface glycoprotein CD8 alpha chain	-0.17864	-0.10587
SeqId_15472_16	Low-density lipoprotein receptor-related protein 11	0.161106	0.046688
SeqId_15486_126	Amiloride-sensitive amine oxidase [copper-containing]	0.015996	0.033919
SeqId_15511_37	Neuronal pentraxin receptor	-0.26393	-0.41128
SeqId_15513_108	Prostasin	0.322268	0.074081
SeqId_15514_26	Cholinesterase	0.05865	0.080275
SeqId_15533_97	Macrophage scavenger receptor types I and II	0.237616	0.045636
SeqId_15540_6	Vimentin	-0.01505	-0.0107
SeqId_15544_25	Kallikrein-14	-0.30214	-0.07722
SeqId_15558_63	Glutamyl aminopeptidase	-0.06354	-0.02548
SeqId_15565_102	Mucin-16	-0.0802	-0.0003
SeqId_15589_1	Vitamin D-binding protein	-0.56839	-0.32241
SeqId_15626_223	Basement membrane-specific heparan sulfate proteoglycan core protein	-0.01016	-0.14128
SeqId_15640_54	Transgelin	1.59687	1.38264
SeqId_15678_71	Dickkopf-related protein 2	0.763166	0.054772
SeqId_16302_11	BPI fold-containing family A member 2	0.005896	0.040219
SeqId_16613_3	Cadherin-17	0.027211	0.008023
SeqId_16616_137	Beta-enolase	-0.08551	-0.08813
SeqId_16818_200	CUB domain-containing protein 1	0.746976	0.511624
SeqId_16899_59	Oxysterol-binding protein-related protein 9	0.050548	0.054213
SeqId_17156_72	Serine/threonine-protein kinase DCLK1	-0.22673	-0.01939
SeqId_17170_15	Calcitonin gene-related peptide 2	-0.06921	-0.10236
SeqId_17175_5	Dual specificity mitogen-activated protein kinase kinase 6	0.012313	0.007634
SeqId_17224_12	Mimecan	0.071625	0.018176
SeqId_17231_1	Plastin-2	-0.34061	-0.05759
SeqId_17346_61	Follicular dendritic cell secreted peptide	-0.19732	-0.11949
SeqId_18216_22	Interleukin-11 receptor subunit alpha	0.158487	0.037727
SeqId_18268_5	G antigen 2A	-0.00891	-0.04714
SeqId_18880_81	Collagen alpha-1(III) chain	-0.5378	-0.24581
SeqId_18881_7	CD97 antigen	0.040751	0.147943
SeqId_18886_28	Down syndrome cell adhesion molecule-like protein 1	-0.01014	-0.03539
SeqId_18893_26	Adhesion G-protein coupled receptor G1	0.415987	0.419871
SeqId_18932_84	Nicotinamide/nicotinic acid mononucleotide adenylyltransferase 1	-0.02347	-0.02499
SeqId_19126_4	Regulation of nuclear pre-mRNA domain-containing protein 1B	0.054283	0.064538
SeqId_19329_31	Homeodomain-interacting protein kinase 3	0.039188	0.333458
SeqId_19369_17	Histone acetyltransferase KAT2A	0.028242	0.076342
SeqId_19511_8	DCN1-like protein 2	-0.00378	-0.15491
SeqId_19601_15	Ankyrin repeat and SOCS box protein 9	0.060143	0.064684
SeqId_2212_69	Tissue-type plasminogen activator	0.149531	0.219345
SeqId_2475_1	Mast/stem cell growth factor receptor Kit	-0.47617	-0.57143
SeqId_2516_57	C-C motif chemokine 21	-0.25472	-0.3875
SeqId_2658_27	NT-3 growth factor receptor	0.642063	0.156593
SeqId_2677_1	Epidermal growth factor receptor	-1.20507	-0.23627
SeqId_2773_50	Interleukin-10	-0.01115	-0.04656
SeqId_2813_11	Agouti-related protein	-0.85808	-0.27418
SeqId_2834_54	Kallikrein-8	-0.25232	-0.25726
SeqId_2849_49	Allograft inflammatory factor 1	-0.12334	-0.05079
SeqId_2939_10	Artemin	-0.02088	-0.17605
SeqId_2953_31	Glycoprotein hormones alpha chain|Lutropin subunit beta	-0.22389	-0.07831
SeqId_3022_4	Cytotoxic T-lymphocyte protein 4	-0.07154	-0.01686
SeqId_3045_72	Pleiotrophin	1.68129	2.15934
SeqId_3168_8	A disintegrin and metalloproteinase with thrombospondin motifs 5	0.942595	0.072378
SeqId_3175_51	A disintegrin and metalloproteinase with thrombospondin motifs 13	-0.17556	-0.2318
SeqId_3198_4	Iduronate 2-sulfatase	0.213496	0.421325
SeqId_3216_2	Polymeric immunoglobulin receptor	-0.22696	-0.03537
SeqId_3221_54	Secreted frizzled-related protein 1	-0.04563	-0.22163
SeqId_3234_23	Coiled-coil domain-containing protein 80	0.999768	0.426657
SeqId_3296_92	Contactin-2	0.262279	0.060301
SeqId_3302_58	Cystatin-F	0.017164	0.10354
SeqId_3327_27	Netrin-4	-0.52635	-0.98844
SeqId_3362_61	Chordin-like protein 1	1.94572	2.24813
SeqId_3365_7	Dickkopf-related protein 4	0.333622	0.125348
SeqId_3366_51	Extracellular matrix protein 1	-0.33089	-0.4716
SeqId_3378_49	Kallikrein-7	-0.16019	-0.51682
SeqId_3396_54	Renin	0.155454	0.112031
SeqId_3415_61	Bone sialoprotein 2	-0.03073	-0.04381
SeqId_3427_63	Casein kinase II subunit alpha	0.035611	0.085292
SeqId_3434_34	Fibronectin	0.139416	0.254689
SeqId_3448_13	Insulin receptor	0.22392	0.074303
SeqId_3505_6	Lymphotoxin-alpha|Lymphotoxin-beta	-0.38879	-0.53832
SeqId_3581_53	Alpha-2-HS-glycoprotein	-0.29098	-0.2031
SeqId_3585_54	Basigin	-0.33454	-0.17082
SeqId_3607_71	Dickkopf-related protein 3	0.931529	0.093729
SeqId_3710_49	Plasminogen	-0.36738	-0.19209
SeqId_3795_6	Disintegrin and metalloproteinase domain-containing protein 9	-0.02094	-0.02418
SeqId_3799_11	Carbonic anhydrase 3	0.024341	0.072162
SeqId_3803_10	Cystatin-D	0.223406	0.070779
SeqId_3807_1	Fibroblast growth factor 23	-0.21324	-0.13148
SeqId_4123_60	Fibroblast growth factor 4	-0.11996	0.025463
SeqId_4125_52	Advanced glycosylation end product-specific receptor	-0.17854	-0.1525
SeqId_4145_58	Neurotrophin-3	-0.34732	-0.33634
SeqId_4151_6	Plasminogen	-0.53909	-0.89173
SeqId_4324_33	Cystatin-SA	0.060916	0.017112
SeqId_4374_45	Growth/differentiation factor 15	1.01122	0.061163
SeqId_4455_89	Lactadherin	-0.37533	-0.12194
SeqId_4496_60	Macrophage metalloelastase	0.567961	0.492916
SeqId_4541_49	Cell adhesion molecule-related/down-regulated by oncogenes	-0.50197	-0.3559
SeqId_4549_78	Alpha-(1,3)-fucosyltransferase 5	-0.09292	-0.13189
SeqId_4551_72	Adhesion G-protein coupled receptor G5	-0.13406	-0.07477
SeqId_4588_1	Pancreatic prohormone	0.212389	0.196581
SeqId_4673_13	Interleukin-6	-0.01612	-0.17068
SeqId_4763_31	Afamin	0.00708	0.394075
SeqId_4801_13	Lactoperoxidase	-0.17378	-0.05604
SeqId_4891_50	Glucagon	-0.09573	-0.42965
SeqId_4916_2	Immunoglobulin heavy constant delta	-0.05452	-0.04193
SeqId_4930_21	Stanniocalcin-1	0.099805	0.167417
SeqId_4982_54	Elafin	0.009647	0.009389
SeqId_5065_8	CD83 antigen	-0.01048	-0.04513
SeqId_5087_5	Interleukin-22 receptor subunit alpha-2	-0.19443	-0.19846
SeqId_5108_72	Neurogenic locus notch homolog protein 3	0.927087	1.32878
SeqId_5178_5	High affinity cAMP-specific 3',5'-cyclic phosphodiesterase 7A	0.068464	-0.04386
SeqId_5307_12	Coagulation factor IX	0.037493	0.072889
SeqId_5363_51	Semaphorin-3E	0.416049	0.473918
SeqId_5364_7	Protein SET	-0.37188	-0.47328
SeqId_5437_63	Fatty acid-binding protein, heart	-0.14467	-0.16166
SeqId_5463_22	Growth arrest-specific protein 1	-0.49027	-0.07587
SeqId_5534_49	Tumor necrosis factor receptor superfamily member 10B	0.058727	-0.01325
SeqId_5631_83	Promotilin	0.445469	0.073198
SeqId_5632_6	Cartilage acidic protein 1	0.968159	0.761184
SeqId_5648_28	Chymotrypsinogen B2	0.040781	0.037037
SeqId_5677_15	Uncharacterized protein C2orf66	-0.01723	-0.08206
SeqId_5682_13	Vasorin	-0.25343	-0.61872
SeqId_5690_49	Tuftelin	0.169261	0.194144
SeqId_5698_60	Tenascin-X	-0.44924	-0.06197
SeqId_5740_17	Roundabout homolog 1	-0.27416	-0.17819
SeqId_5980_55	BolA-like protein 3	-0.0498	-0.01308
SeqId_6060_2	Prolactin-inducible protein	-0.03036	-0.01629
SeqId_6081_52	Procollagen C-endopeptidase enhancer 2	-0.31119	-0.30122
SeqId_6228_58	Sperm acrosome membrane-associated protein 1	0.081487	-0.06492
SeqId_6367_66	Fibromodulin	-0.89561	-0.48118
SeqId_6373_54		0.487454	0.117792
SeqId_6385_63	von Willebrand factor A domain-containing protein 1	-0.26165	-0.00707
SeqId_6392_7	WNT1-inducible-signaling pathway protein 2	1.58161	1.83301
SeqId_6402_8	Paired immunoglobulin-like type 2 receptor alpha	-0.01944	-0.00146
SeqId_6408_2	Inhibin beta C chain	0.091667	0.357803
SeqId_6434_18	Retina-specific copper amine oxidase	0.077951	0.099578
SeqId_6471_53	Complement factor H-related protein 4	-0.00882	-0.00426
SeqId_6472_40	Melanocyte protein PMEL	-0.43468	-0.16793
SeqId_6485_59	Immunoglobulin lambda-like polypeptide 1	-0.14927	-0.12094
SeqId_6496_60	Protein delta homolog 1	0.006413	0.122411
SeqId_6510_56	E3 ubiquitin-protein ligase RNF128	-0.09541	-0.02789
SeqId_6556_5	Ectonucleotide pyrophosphatase/phosphodiesterase family member 5	-0.33092	-0.16786
SeqId_6557_50	Leucine-rich repeat-containing protein 15	0.392234	0.059167
SeqId_6649_51	Netrin-1	0.09284	0.270168
SeqId_6917_49	Leucine-rich repeat-containing protein 3	-0.09311	-0.00457
SeqId_6920_1	GDNF family receptor alpha-like	0.090899	0.064113
SeqId_6947_4	Type 2 lactosamine alpha-2,3-sialyltransferase	-0.05404	-0.05794
SeqId_6948_82	Polyphosphoinositide phosphatase	-0.00913	0.039141
SeqId_7156_2	Alpha-(1,3)-fucosyltransferase 10	0.068863	0.060992
SeqId_7163_26	Extracellular glycoprotein lacritin	-0.0368	-0.0979
SeqId_7179_69	Neurofascin	0.410909	0.026999
SeqId_7251_64	Complement C1q tumor necrosis factor-related protein 3	0.511646	0.448617
SeqId_7655_11	Natriuretic peptides B	0.119665	0.081768
SeqId_7778_104	Caspase recruitment domain-containing protein 19	-0.06972	-0.01562
SeqId_7857_22	Neurotensin/neuromedin N	-0.06946	-0.15211
SeqId_7861_9	Tyrosine-protein kinase transmembrane receptor ROR2	-0.50337	-0.00608
SeqId_7918_114	Alpha-amylase 1	0.040578	0.044371
SeqId_7923_41	Semaphorin-4C	-0.11435	-0.20062
SeqId_7945_10	Semaphorin-6A	0.012243	0.003241
SeqId_7956_11	MICOS complex subunit MIC10	0.01215	0.071432
SeqId_7970_315	Ecto-ADP-ribosyltransferase 3	-0.34856	-0.30541
SeqId_8003_57	Leucine-rich repeat LGI family member 3	-0.07045	-0.03212
SeqId_8053_16	DnaJ homolog subfamily B member 14	-0.00815	0.051452
SeqId_8093_13	Myogenesis-regulating glycosidase	0.01405	-0.0238
SeqId_8250_2	Receptor-type tyrosine-protein phosphatase eta	-0.03278	-0.55788
SeqId_8258_22	UDP-glucuronic acid decarboxylase 1	-0.63292	-0.28476
SeqId_8263_64	TYMS opposite strand protein	-0.27094	0.001062
SeqId_8272_22	3-keto-steroid reductase	0.04631	0.023012
SeqId_8304_50	Tumor necrosis factor receptor superfamily member 11B	0.125798	0.349773
SeqId_8337_65	Receptor-type tyrosine-protein phosphatase U	0.260628	0.145958
SeqId_8346_9	Dipeptidyl peptidase 2	0.188714	0.027738
SeqId_8347_222	Beta-defensin 129	-0.23013	-0.05863
SeqId_8355_80	Isthmin-1	-0.01184	0.007994
SeqId_8394_56	Non-secretory ribonuclease	-0.05774	-0.05671
SeqId_8396_42	Fatty-acid amide hydrolase 2	-0.00035	-0.00851
SeqId_8447_11	Appetite-regulating hormone	-0.1046	-0.30579
SeqId_8464_31	R-spondin-4	0.592974	0.579396
SeqId_8480_29	EGF-containing fibulin-like extracellular matrix protein 1	0.509374	0.621632
SeqId_8803_61	Nectin-1	-0.18948	0.217685
SeqId_8841_65	Cartilage intermediate layer protein 2	-0.44981	-0.19533
SeqId_8890_9	Transmembrane protein 132B	-1.49304	-0.29138
SeqId_8956_96	Scavenger receptor class F member 2	2.3658	1.20935
SeqId_8974_172	Collagen alpha-1(XV) chain	-0.79479	-1.46688
SeqId_9004_24	Low-density lipoprotein receptor class A domain-containing protein 4	0.019965	0.121606
SeqId_9018_38	Protocadherin-10	0.642556	0.193312
SeqId_9059_14	Rap guanine nucleotide exchange factor 5	0.230235	0.00701
SeqId_9076_25	Proenkephalin-A	0.085816	0.307095
SeqId_9172_69	Neutrophil collagenase	-0.23541	-0.1435
SeqId_9185_15	Trefoil factor 1	0.250293	0.070113
SeqId_9212_22	Cathepsin F	0.26938	0.086161
SeqId_9244_27	Palmitoyl-protein thioesterase 1	-0.16582	-0.14681
SeqId_9256_78	Neuronal pentraxin-1	0.090696	-0.02975
SeqId_9296_15	Receptor-type tyrosine-protein phosphatase delta	-0.49341	-0.08411
SeqId_9297_12	UDP-GlcNAc:betaGal beta-1,3-N-acetylglucosaminyltransferase 8	0.188639	0.008092
SeqId_9343_16	Interleukin-2 receptor subunit beta	-0.20226	-0.05669
SeqId_9409_11	Tryptase alpha/beta-1	0.134965	0.046687
SeqId_9459_7	Tumor necrosis factor receptor superfamily member 6	0.347277	0.142368
SeqId_9474_22	Asialoglycoprotein receptor 2	-0.03981	-0.0188
SeqId_9523_34	Integral membrane protein 2C	-0.0316	0.23307
SeqId_9525_1	Inactive tyrosine-protein kinase 7	-1.24903	-0.27512
SeqId_9536_16	Epididymal secretory protein E3-alpha	0.065642	0.002867
SeqId_9595_11	Beta-1,4-galactosyltransferase 2	-0.29334	-0.49406
SeqId_9774_59	RING finger protein 150	-0.03275	-0.05352
SeqId_9793_145	Immunoglobulin superfamily DCC subclass member 4	-1.27898	-0.49404
SeqId_9826_135	Bis(5'-adenosyl)-triphosphatase	0.002302	-0.01275
SeqId_9834_62	Alcohol dehydrogenase 1B	-0.09295	0.002359
SeqId_9850_38	Eukaryotic translation initiation factor 1A, X-chromosomal	-0.09743	-0.02118
SeqId_9867_23	Fructose-1,6-bisphosphatase isozyme 2	-0.01365	-0.05475
SeqId_9885_41	Ras-related protein Rap-2a	-0.02022	-0.04118
SeqId_9942_2	NTF2-related export protein 1	-0.00677	-0.22259
